# Supplementary material for: Assessing and genotyping threatened staghorn coral Acropora cervicornis nurseries during restoration in southeast Dominican Republic
Source: PeerJ. 2020 Apr 17;8:e8863. doi: 10.7717/peerj.8863 (PMC7169967; doi:10.7717/peerj.8863)
Supplement: Supplemental Information 2 [file peerj-08-8863-s002.xlsx]

## Sheet: Hoja1
4	32	1	32
			RD
CODE	SITE	166		181		182		207
1	RD	168	169	152	152	174	174	177	177
2	RD	166	168	152	152	167	174	180	188
3	RD	168	168	152	152	167	174	180	188
4	RD	168	168	152	152	157	161	180	188
5	RD	168	168	152	152	171	175	183	185
6	RD	165	165	152	153	161	164	183	183
7	RD	162	168	153	156	161	164	183	183
8	RD	168	168	152	152	171	175	180	182
9	RD	168	168	152	152	167	168	181	181
10	RD	166	166	157	160	157	161	183	183
11	RD	163	164	152	152	174	174	180	182
12	RD	155	159	145	151	161	164	183	183
13	RD	160	168	154	154	165	165	177	185
14	RD	160	168	154	154	165	165	182	182
15	RD	163	164	152	152	174	174	177	177
16	RD	163	164	152	152	174	174	178	178
17	RD	163	168	152	152	174	174	182	190
18	RD	160	174	152	152	174	174	182	190
19	RD	163	168	152	153	161	165	182	190
20	RD	163	168	150	152	161	165	182	190
21	RD	163	168	150	152	159	163	182	182
22	RD	163	168	150	152	159	163	182	190
23	RD	160	174	152	155	166	173	180	185
24	RD	168	168	147	152	168	173	180	185
25	RD	168	168	152	152	168	173	178	178
26	RD	168	168	152	152	168	173	180	190
27	RD	168	168	152	152	167	173	177	187
28	RD	168	168	152	152	168	173	180	192
29	RD	166	169	152	153	167	173	183	191
30	RD	166	169	152	153	168	173	183	191
31	RD	166	169	150	154	168	173	182	182
32	RD	164	165	150	154	168	173	182	189

## Sheet: HFL
Heterozygosity, Fstatistics and Polymorphism by Locus for Codominant Data
Data Sheet	Hoja1
Data Title
No. Loci	4
No. Samples	32
No. Pops.	1
Sample Size, No. Alleles, No. Effective Alleles, Information Index, Observed Heterozygosity, Expected and Unbiased Expected Heterozygosity, and Fixation Index
Pop		166	181	182	207
RD	N	32	32	32	32
	Na	11	11	13	13
	Ne	3.84962	2.30891	8.192	7.84674
	I	1.80358	1.36042	2.29553	2.25641
	Ho	0.625	0.4375	0.75	0.625
	He	0.740234	0.566895	0.87793	0.872559
	UHe	0.751984	0.575893	0.891865	0.886409
	F	0.155673	0.228252	0.145717	0.283716
Grand Mean and SE over Pops and Loci
		Total
N	Mean	32
	SE	0
Na	Mean	12
	SE	0.57735
Ne	Mean	5.54932
	SE	1.46205
I	Mean	1.92898
	SE	0.219952
Ho	Mean	0.609375
	SE	0.0644235
He	Mean	0.764404
	SE	0.0731321
UHe	Mean	0.776538
	SE	0.0742929
F	Mean	0.203339
	SE	0.0324979
Percentage of Polymorphic Loci
Population	%P
RD	1
Na = No. of Different Alleles
Ne = No. of Effective Alleles = 1 / (Sum pi^2)
I = Shannon's Information Index = -1* Sum (pi * Ln (pi))
Ho = Observed Heterozygosity = No. of Hets / N
He = Expected Heterozygosity = 1 - Sum pi^2
UHe = Unbiased Expected Heterozygosity = (2N / (2N-1)) * He
F = Fixation Index = (He - Ho) / He = 1 - (Ho / He)
Where pi is the frequency of the ith allele for the population & Sum pi^2 is the sum of the squared population allele frequencies.

## Sheet: PCA
Principal Coordinates Analysis (PCA)
PCA via Covariance matrix with data standardization
Data Sheet	Hoja1
Data Title
No. Samples	32
Percentage of variation explained by the first 3 axes
Axis	1	2	3
%	86.9488	7.26198	3.12071
Cum %	86.9488	94.2108	97.3315
Eigen Values by Axis and Sample Eigen Vectors
Axis No.	1	2	3	4	5	6
EigenValue	5.85262	0.488812	0.210058	0.132514	0.0454838	0.00162293
168	0.869351	-0.0834758	-0.204313	0.00212314	-0.0621698	-0.0276422
166	0.862504	-0.0395943	-0.182333	0.00403137	-0.0556783	0.0292169
168	0.829083	0.0268971	0.00494307	0.00176878	0.183491	-0.00105861
168	0.743646	0.106116	0.353289	-0.00706199	-0.0692262	-0.00131448
168	-0.206222	-0.486692	0.0594625	-0.176459	0.00531289	0.00103458
165	-0.427201	-0.111592	0.0176736	0.296311	-0.000435342	-4.72772e-05
162	-0.662946	0.453601	-0.0751675	-0.115948	-0.00530059	-0.00111401
168	-1.56196	-0.104115	-0.0249681	-0.0075817	0.000718628	-0.000102422
168	-0.0185938	0.00995228	0.00214223	0.000117326	0.000136996	4.28562e-05
166	-0.0185938	0.00995228	0.00214223	0.000117326	0.000137001	4.30556e-05
163	-0.0185938	0.00995228	0.00214223	0.000117326	0.000136995	4.28156e-05
155	-0.0185938	0.00995228	0.00214223	0.000117326	0.000136995	4.28156e-05
160	-0.0185938	0.00995228	0.00214223	0.000117326	0.000136995	4.28156e-05
160	-0.0185938	0.00995228	0.00214223	0.000117326	0.000136995	4.28156e-05
163	-0.0185938	0.00995228	0.00214223	0.000117326	0.000136995	4.28156e-05
163	-0.0185938	0.00995228	0.00214223	0.000117326	0.000136995	4.28156e-05
163	-0.0185938	0.00995228	0.00214223	0.000117326	0.000136995	4.28156e-05
160	-0.0185938	0.00995228	0.00214223	0.000117326	0.000136995	4.28156e-05
163	-0.0185938	0.00995227	0.00214223	0.000117326	0.000136995	4.28156e-05
163	-0.0185938	0.00995227	0.00214223	0.000117308	0.000136995	4.28156e-05
163	-0.0185938	0.00995228	0.00214223	0.000117325	0.000136993	4.28156e-05
163	-0.0185938	0.00995228	0.00214223	0.000117325	0.000136993	4.28156e-05
160	-0.0185938	0.00995228	0.00214223	0.000117325	0.000136993	4.28156e-05
168	-0.0185938	0.00995228	0.00214223	0.000117325	0.000136993	4.28156e-05
168	-0.0185938	0.00995228	0.00214223	0.000117325	0.000136992	4.28156e-05
168	-0.0185938	0.00995228	0.00214223	0.000117325	0.000136965	4.28156e-05
168	-0.0185938	0.00995228	0.00214223	0.000117325	0.000136965	4.28156e-05
168	-0.0185938	0.00995228	0.00214223	0.000117325	0.000136966	4.28156e-05
166	-0.0185938	0.00995228	0.00214223	0.000117325	0.000136967	4.28156e-05
166	-0.0185938	0.00995228	0.00214223	0.000117325	0.000136968	4.28156e-05
166	-0.0185938	0.00995227	0.00214223	0.000117325	0.000136969	4.28156e-05
164	-0.0185938	0.00995228	0.00214223	0.000117325	0.000136969	4.28156e-05

## Sheet: AFP
Allele Frequencies by Population for Codominant Data
Data Sheet	Hoja1
Data Title
No. Loci	4
No. Samples	32
No. Pops.	1
Allele Frequencies and Sample Size by Populations
Locus	Allele/n	RD
166	N	32
	155	0.01563
	159	0.01563
	160	0.0625
	162	0.01563
	163	0.125
	164	0.0625
	165	0.04688
	166	0.09375
	168	0.46875
	169	0.0625
	174	0.03125
181	N	32
	145	0.01563
	147	0.01563
	150	0.07813
	151	0.01563
	152	0.64063
	153	0.07813
	154	0.09375
	155	0.01563
	156	0.01563
	157	0.01563
	160	0.01563
182	N	32
	157	0.03125
	159	0.03125
	161	0.10938
	163	0.03125
	164	0.04688
	165	0.09375
	166	0.01563
	167	0.07813
	168	0.125
	171	0.03125
	173	0.15625
	174	0.21875
	175	0.03125
207	N	32
	177	0.09375
	178	0.0625
	180	0.14063
	181	0.03125
	182	0.21875
	183	0.17188
	185	0.0625
	187	0.01563
	188	0.04688
	189	0.01563
	190	0.09375
	191	0.03125
	192	0.01563

## Sheet: AGF
Allele Frequencies with Graphs by Population and Locus for Codominant Data
Data Sheet	Hoja1
Data Title
No. Loci	4
No. Samples	32
No. Pops.	1
Allele Frequencies by Populations For Graph By Locus
Locus	Allele	RD
166	155	0.01563
	159	0.01563
	160	0.0625
	162	0.01563
	163	0.125
	164	0.0625
	165	0.04688
	166	0.09375
	168	0.46875
	169	0.0625
	174	0.03125
Locus	Allele	RD
181	145	0.01563
	147	0.01563
	150	0.07813
	151	0.01563
	152	0.64063
	153	0.07813
	154	0.09375
	155	0.01563
	156	0.01563
	157	0.01563
	160	0.01563
Locus	Allele	RD
182	157	0.03125
	159	0.03125
	161	0.10938
	163	0.03125
	164	0.04688
	165	0.09375
	166	0.01563
	167	0.07813
	168	0.125
	171	0.03125
	173	0.15625
	174	0.21875
	175	0.03125
Locus	Allele	RD
207	177	0.09375
	178	0.0625
	180	0.14063
	181	0.03125
	182	0.21875
	183	0.17188
	185	0.0625
	187	0.01563
	188	0.04688
	189	0.01563
	190	0.09375
	191	0.03125
	192	0.01563

## Sheet: AFL
Allele Frequencies by Locus for Codominant Data
Data Sheet	Hoja1
Data Title
No. Loci	4
No. Samples	32
No. Pops.	1
Allele Frequencies and Sample Size by Locus
Pop	Allele/n	166	181	182	207
RD	N	32	32	32	32
	145		0.01563
	147		0.01563
	150		0.07813
	151		0.01563
	152		0.64063
	153		0.07813
	154		0.09375
	155	0.01563	0.01563
	156		0.01563
	157		0.01563	0.03125
	159	0.01563		0.03125
	160	0.0625	0.01563
	161			0.10938
	162	0.01563
	163	0.125		0.03125
	164	0.0625		0.04688
	165	0.04688		0.09375
	166	0.09375		0.01563
	167			0.07813
	168	0.46875		0.125
	169	0.0625
	171			0.03125
	173			0.15625
	174	0.03125		0.21875
	175			0.03125
	177				0.09375
	178				0.0625
	180				0.14063
	181				0.03125
	182				0.21875
	183				0.17188
	185				0.0625
	187				0.01563
	188				0.04688
	189				0.01563
	190				0.09375
	191				0.03125
	192				0.01563

## Sheet: APT
Allelic Patterns for Codominant Data
Data Sheet	Hoja1
Data Title
No. Loci	4
No. Samples	32
No. Pops.	1
Mean Allelic Patterns Across Populations
Mean values
Population	RD
Na	12
Na Freq. >= 5%	5.75
Ne	5.54932
I	1.92898
No. Private Alleles	12
No. LComm Alleles (<=25%)	0
No. LComm Alleles (<=50%)	0
He	0.764404
UHe	0.776538
Standard Error (SE) values
Population	RD
Na	0.57735
Na Freq. >= 5%	0.629153
Ne	1.46205
I	0.219952
No. Private Alleles	0.57735
No. LComm Alleles (<=25%)	0
No. LComm Alleles (<=50%)	0
He	0.0731321
UHe	0.0742929
Na = No. of Different Alleles
Na (Freq >= 5%) = No. of Different Alleles with a Frequency >= 5%
Ne = No. of Effective Alleles = 1 / (Sum pi^2)
I = Shannon's Information Index = -1* Sum (pi * Ln (pi))
No. Private Alleles = No. of Alleles Unique to a Single Population
No. LComm Alleles (<=25%) = No. of Locally Common Alleles (Freq. >= 5%) Found in 25% or Fewer Populations
No. LComm Alleles (<=50%) = No. of Locally Common Alleles (Freq. >= 5%) Found in 50% or Fewer Populations
He = Expected Heterozygosity = 1 - Sum pi^2
UHe = Unbiased Expected Heterozygosity = (2N / (2N-1)) * He

## Sheet: ALI
Allele List for Codominant Data
Data Sheet	Hoja1
Data Title
No. Loci	4
No. Samples	32
No. Pops.	1
Alleles	166	181	182	207
145	0	1	0	0
147	0	1	0	0
150	0	1	0	0
151	0	1	0	0
152	0	1	0	0
153	0	1	0	0
154	0	1	0	0
155	1	1	0	0
156	0	1	0	0
157	0	1	1	0
159	1	0	1	0
160	1	1	0	0
161	0	0	1	0
162	1	0	0	0
163	1	0	1	0
164	1	0	1	0
165	1	0	1	0
166	1	0	1	0
167	0	0	1	0
168	1	0	1	0
169	1	0	0	0
171	0	0	1	0
173	0	0	1	0
174	1	0	1	0
175	0	0	1	0
177	0	0	0	1
178	0	0	0	1
180	0	0	0	1
181	0	0	0	1
182	0	0	0	1
183	0	0	0	1
185	0	0	0	1
187	0	0	0	1
188	0	0	0	1
189	0	0	0	1
190	0	0	0	1
191	0	0	0	1
192	0	0	0	1
Total No. Alleles	11	11	13	13
