# Supplementary material for: Assessing and genotyping threatened staghorn coral Acropora cervicornis nurseries during restoration in southeast Dominican Republic
Source: PeerJ. 2020 Apr 17;8:e8863. doi: 10.7717/peerj.8863 (PMC7169967; doi:10.7717/peerj.8863)
Supplement: Supplemental Information 3 [file peerj-08-8863-s003.xlsx]

## Sheet: Hoja1
4	145	1	145
			RD
CODE	SITE	166		181		182		207
1	RD	168	169	152	152	174	174	177	177
2	RD	168	169	152	152	174	174	177	177
3	RD	168	169	152	152	174	174	177	177
4	RD	168	169	152	152	174	174	177	177
5	RD	168	169	152	152	174	174	177	177
6	RD	168	169	152	152	174	174	177	177
7	RD	168	169	152	152	174	174	177	177
8	RD	166	168	152	152	167	174	180	188
9	RD	166	168	152	152	167	174	180	188
10	RD	166	168	152	152	167	174	180	188
11	RD	166	168	152	152	167	174	180	188
12	RD	168	168	152	152	167	174	180	188
13	RD	168	168	152	152	167	174	180	188
14	RD	168	168	152	152	167	174	180	188
15	RD	168	168	152	152	167	174	180	188
16	RD	168	168	152	152	157	161	180	188
17	RD	168	168	152	152	157	161	180	188
18	RD	168	168	152	152	157	161	180	188
19	RD	168	168	152	152	157	161	180	188
20	RD	168	168	152	152	157	161	180	188
21	RD	168	168	152	152	171	175	183	185
22	RD	168	168	152	152	171	175	183	185
23	RD	168	168	152	152	171	175	183	185
24	RD	168	168	152	152	171	175	183	185
25	RD	168	168	152	152	171	175	183	185
26	RD	168	168	152	152	171	175	183	185
27	RD	165	165	152	153	161	164	183	183
28	RD	165	165	152	153	161	164	183	183
29	RD	165	165	152	153	161	164	183	183
30	RD	162	168	153	156	161	164	183	183
31	RD	162	168	153	156	161	164	183	183
32	RD	162	168	153	156	161	164	183	183
33	RD	165	165	152	153	161	164	183	183
34	RD	165	165	152	153	161	164	183	183
35	RD	168	168	152	152	171	175	180	182
36	RD	168	168	152	152	171	175	180	182
37	RD	168	168	152	152	171	175	180	182
38	RD	168	168	152	152	171	175	180	182
39	RD	168	168	152	152	171	175	180	182
40	RD	168	168	152	152	167	168	181	181
41	RD	168	168	152	152	167	168	181	181
42	RD	168	168	152	152	167	168	181	181
43	RD	168	168	152	152	167	168	181	181
44	RD	168	168	152	152	167	168	181	181
45	RD	166	166	157	160	157	161	183	183
46	RD	166	166	157	160	157	161	183	183
47	RD	166	166	157	160	157	161	183	183
48	RD	166	166	157	160	157	161	183	183
49	RD	166	166	157	160	157	161	183	183
50	RD	163	164	152	152	174	174	180	182
51	RD	163	164	152	152	174	174	180	182
52	RD	163	164	152	152	174	174	180	182
53	RD	163	164	152	152	174	174	180	182
54	RD	155	159	145	151	161	164	183	183
55	RD	155	159	145	151	161	164	183	183
56	RD	155	159	145	151	161	164	183	183
57	RD	155	159	145	151	161	164	183	183
58	RD	155	159	145	151	161	164	183	183
59	RD	160	168	154	154	165	165	177	185
60	RD	160	168	154	154	165	165	177	185
61	RD	160	168	154	154	165	165	182	182
62	RD	160	168	154	154	165	165	182	182
63	RD	160	168	154	154	165	165	182	182
64	RD	160	168	154	154	165	165	182	182
65	RD	160	168	154	154	165	165	182	182
66	RD	160	168	154	154	165	165	182	182
67	RD	160	168	154	154	165	165	182	182
68	RD	163	164	152	152	174	174	177	177
69	RD	163	164	152	152	174	174	177	177
70	RD	163	164	152	152	174	174	177	177
71	RD	163	164	152	152	174	174	177	177
72	RD	163	164	152	152	174	174	178	178
73	RD	163	164	152	152	174	174	178	178
74	RD	163	164	152	152	174	174	178	178
75	RD	163	164	152	152	174	174	178	178
76	RD	163	168	152	152	174	174	182	190
77	RD	163	168	152	152	174	174	182	190
78	RD	163	168	152	152	174	174	182	190
79	RD	163	168	152	152	174	174	182	190
80	RD	160	174	152	152	174	174	182	190
81	RD	160	174	152	152	174	174	182	190
82	RD	160	174	152	152	174	174	182	190
83	RD	160	174	152	152	174	174	182	190
84	RD	160	174	152	152	174	174	182	190
85	RD	160	174	152	152	174	174	182	190
86	RD	163	168	152	153	161	165	182	190
87	RD	163	168	152	153	161	165	182	190
88	RD	163	168	152	153	161	165	182	190
89	RD	163	168	150	152	161	165	182	190
90	RD	163	168	150	152	161	165	182	190
91	RD	163	168	150	152	161	165	182	190
92	RD	163	168	150	152	161	165	182	190
93	RD	163	168	150	152	161	165	182	190
94	RD	163	168	150	152	161	165	182	190
95	RD	163	168	150	152	161	165	182	190
96	RD	163	168	150	152	161	165	182	190
97	RD	163	168	150	152	159	163	182	182
98	RD	163	168	150	152	159	163	182	182
99	RD	163	168	150	152	159	163	182	190
100	RD	163	168	150	152	159	163	182	190
101	RD	163	168	150	152	159	163	182	190
102	RD	163	168	150	152	159	163	182	190
103	RD	163	168	150	152	159	163	182	190
104	RD	163	168	150	152	159	163	182	190
105	RD	163	168	150	152	159	163	182	190
106	RD	160	174	152	155	166	173	180	185
107	RD	160	174	152	155	166	173	180	185
108	RD	160	174	152	155	166	173	180	185
109	RD	160	174	152	155	166	173	180	185
110	RD	160	174	152	155	166	173	180	185
111	RD	168	168	147	152	168	173	180	185
112	RD	168	168	147	152	168	173	180	185
113	RD	168	168	147	152	168	173	180	185
114	RD	168	168	147	152	168	173	180	185
115	RD	168	168	152	152	168	173	178	178
116	RD	168	168	152	152	168	173	178	178
117	RD	168	168	152	152	168	173	180	190
118	RD	168	168	152	152	168	173	180	190
119	RD	168	168	152	152	168	173	180	190
120	RD	168	168	152	152	168	173	180	190
121	RD	168	168	152	152	168	173	180	190
122	RD	168	168	152	152	168	173	180	190
123	RD	168	168	152	152	168	173	180	190
124	RD	168	168	152	152	167	173	177	187
125	RD	168	168	152	152	167	173	177	187
126	RD	168	168	152	152	167	173	177	187
127	RD	168	168	152	152	167	173	177	187
128	RD	168	168	152	152	168	173	180	192
129	RD	168	168	152	152	168	173	180	192
130	RD	168	168	152	152	168	173	180	192
131	RD	166	169	152	153	167	173	183	191
132	RD	166	169	152	153	167	173	183	191
133	RD	166	169	152	153	167	173	183	191
134	RD	166	169	152	153	168	173	183	191
135	RD	166	169	152	153	168	173	183	191
136	RD	166	169	152	153	168	173	183	191
137	RD	166	169	150	154	168	173	182	182
138	RD	166	169	150	154	168	173	182	182
139	RD	166	169	150	154	168	173	182	182
140	RD	166	169	150	154	168	173	182	182
141	RD	164	165	150	154	168	173	182	189
142	RD	164	165	150	154	168	173	182	189
143	RD	164	165	150	154	168	173	182	189
144	RD	164	165	150	154	168	173	182	189
145	RD	164	165	150	154	168	173	182	189

## Sheet: PI
Probability of Identity (PI) for each Locus and for Increasing Combinations of the 4 Loci
Data Sheet	Hoja1
Data Title
No. Loci	4
No. Samples	145
No. Pops.	1
PI for Increasing Locus Combinations
Pop	N	1	1+2	1+2+3	1+2+3+4
RD	145	0.0870139	0.0186461	0.000476204	1.53791e-05
PIsibs for Increasing Locus Combinations
Pop	N	1	1+2	1+2+3	1+2+3+4
RD	145	0.402693	0.211279	0.0669058	0.0218037
PI by Locus
Pop	N	166	181	182	207
RD	145	0.0870139	0.214288	0.0255391	0.0322952
PISibs by Locus
Pop	N	166	181	182	207
RD	145	0.402693	0.524666	0.31667	0.325886
Estimated Expected No. Individuals (calculated as respective probability x population size)
Expected No. Individuals with the Same Multilocus Genotype for Increasing Locus Combinations
Pop	N	1	1+2	1+2+3	1+2+3+4
RD	145	12.617	2.70368	0.0690496	0.00222997
Expected No. Individuals with the Same Multilocus Genotype for Increasing Locus Combinations Based on PIsibs
Pop	N	1	1+2	1+2+3	1+2+3+4
RD	145	58.3905	30.6355	9.70135	3.16153
Expected No. Individuals with the Same Genotype at a Given Locus
Pop	N	166	181	182	207
RD	145	12.617	31.0718	3.70317	4.6828
Expected No. Individuals with the Same Genotype at a Given Locus Based on PIsibs
Pop	N	166	181	182	207
RD	145	58.3905	76.0766	45.9172	47.2535
PI = Probability of Identity at a Locus = 2*[Sum (pi^2)^2]-Sum(pi)^4
Where pi is the frequency of the i-th allele at a locus.
PI over multiple loci is calculated as the product of the individual locus PI's.
PISibs = Probability of Identity for Sibs at a Locus = 0.25 + [0.5 * Sum(pi^2) ]+ [0.5 * Sum(pi^2)^ 2] - [0.25 * Sum(pi)^4]
PISibs over multiple loci is calculated as the product of the individual locus PIsibs.

## Sheet: GP
Genotype Probability and Cumulative Product of Genotype Probability
Data Sheet	Hoja1
Data Title
No. Loci	4
No. Samples	145
No. Pops.	1
Genotype Probability for each Locus
Sample	Pop	Genotype	166	181	182	207
1	RD	168169152152174174177177g	0.0553864	0.420262	0.0517955	0.00932224
2	RD	168169152152174174177177g	0.0553864	0.420262	0.0517955	0.00932224
3	RD	168169152152174174177177g	0.0553864	0.420262	0.0517955	0.00932224
4	RD	168169152152174174177177g	0.0553864	0.420262	0.0517955	0.00932224
5	RD	168169152152174174177177g	0.0553864	0.420262	0.0517955	0.00932224
6	RD	168169152152174174177177g	0.0553864	0.420262	0.0517955	0.00932224
7	RD	168169152152174174177177g	0.0553864	0.420262	0.0517955	0.00932224
8	RD	166168152152167174180188g	0.0781926	0.420262	0.0313912	0.0126754
9	RD	166168152152167174180188g	0.0781926	0.420262	0.0313912	0.0126754
10	RD	166168152152167174180188g	0.0781926	0.420262	0.0313912	0.0126754
11	RD	166168152152167174180188g	0.0781926	0.420262	0.0313912	0.0126754
12	RD	168168152152167174180188g	0.223175	0.420262	0.0313912	0.0126754
13	RD	168168152152167174180188g	0.223175	0.420262	0.0313912	0.0126754
14	RD	168168152152167174180188g	0.223175	0.420262	0.0313912	0.0126754
15	RD	168168152152167174180188g	0.223175	0.420262	0.0313912	0.0126754
16	RD	168168152152157161180188g	0.223175	0.420262	0.00808561	0.0126754
17	RD	168168152152157161180188g	0.223175	0.420262	0.00808561	0.0126754
18	RD	168168152152157161180188g	0.223175	0.420262	0.00808561	0.0126754
19	RD	168168152152157161180188g	0.223175	0.420262	0.00808561	0.0126754
20	RD	168168152152157161180188g	0.223175	0.420262	0.00808561	0.0126754
21	RD	168168152152171175183185g	0.223175	0.420262	0.00287753	0.0194055
22	RD	168168152152171175183185g	0.223175	0.420262	0.00287753	0.0194055
23	RD	168168152152171175183185g	0.223175	0.420262	0.00287753	0.0194055
24	RD	168168152152171175183185g	0.223175	0.420262	0.00287753	0.0194055
25	RD	168168152152171175183185g	0.223175	0.420262	0.00287753	0.0194055
26	RD	168168152152171175183185g	0.223175	0.420262	0.00287753	0.0194055
27	RD	165165152153161164183183g	0.00267539	0.0760048	0.0105113	0.027396
28	RD	165165152153161164183183g	0.00267539	0.0760048	0.0105113	0.027396
29	RD	165165152153161164183183g	0.00267539	0.0760048	0.0105113	0.027396
30	RD	162168153156161164183183g	0.00977408	0.00121284	0.0105113	0.027396
31	RD	162168153156161164183183g	0.00977408	0.00121284	0.0105113	0.027396
32	RD	162168153156161164183183g	0.00977408	0.00121284	0.0105113	0.027396
33	RD	165165152153161164183183g	0.00267539	0.0760048	0.0105113	0.027396
34	RD	165165152153161164183183g	0.00267539	0.0760048	0.0105113	0.027396
35	RD	168168152152171175180182g	0.223175	0.420262	0.00287753	0.066302
36	RD	168168152152171175180182g	0.223175	0.420262	0.00287753	0.066302
37	RD	168168152152171175180182g	0.223175	0.420262	0.00287753	0.066302
38	RD	168168152152171175180182g	0.223175	0.420262	0.00287753	0.066302
39	RD	168168152152171175180182g	0.223175	0.420262	0.00287753	0.066302
40	RD	168168152152167168181181g	0.223175	0.420262	0.0156956	0.00118906
41	RD	168168152152167168181181g	0.223175	0.420262	0.0156956	0.00118906
42	RD	168168152152167168181181g	0.223175	0.420262	0.0156956	0.00118906
43	RD	168168152152167168181181g	0.223175	0.420262	0.0156956	0.00118906
44	RD	168168152152167168181181g	0.223175	0.420262	0.0156956	0.00118906
45	RD	166166157160157161183183g	0.00684899	0.00059453	0.00808561	0.027396
46	RD	166166157160157161183183g	0.00684899	0.00059453	0.00808561	0.027396
47	RD	166166157160157161183183g	0.00684899	0.00059453	0.00808561	0.027396
48	RD	166166157160157161183183g	0.00684899	0.00059453	0.00808561	0.027396
49	RD	166166157160157161183183g	0.00684899	0.00059453	0.00808561	0.027396
50	RD	163164152152174174180182g	0.0145541	0.420262	0.0517955	0.066302
51	RD	163164152152174174180182g	0.0145541	0.420262	0.0517955	0.066302
52	RD	163164152152174174180182g	0.0145541	0.420262	0.0517955	0.066302
53	RD	163164152152174174180182g	0.0145541	0.420262	0.0517955	0.066302
54	RD	155159145151161164183183g	0.00059453	0.00059453	0.0105113	0.027396
55	RD	155159145151161164183183g	0.00059453	0.00059453	0.0105113	0.027396
56	RD	155159145151161164183183g	0.00059453	0.00059453	0.0105113	0.027396
57	RD	155159145151161164183183g	0.00059453	0.00059453	0.0105113	0.027396
58	RD	155159145151161164183183g	0.00059453	0.00059453	0.0105113	0.027396
59	RD	160168154154165165177185g	0.0651605	0.00866825	0.01	0.0113199
60	RD	160168154154165165177185g	0.0651605	0.00866825	0.01	0.0113199
61	RD	160168154154165165182182g	0.0651605	0.00866825	0.01	0.0549822
62	RD	160168154154165165182182g	0.0651605	0.00866825	0.01	0.0549822
63	RD	160168154154165165182182g	0.0651605	0.00866825	0.01	0.0549822
64	RD	160168154154165165182182g	0.0651605	0.00866825	0.01	0.0549822
65	RD	160168154154165165182182g	0.0651605	0.00866825	0.01	0.0549822
66	RD	160168154154165165182182g	0.0651605	0.00866825	0.01	0.0549822
67	RD	160168154154165165182182g	0.0651605	0.00866825	0.01	0.0549822
68	RD	163164152152174174177177g	0.0145541	0.420262	0.0517955	0.00932224
69	RD	163164152152174174177177g	0.0145541	0.420262	0.0517955	0.00932224
70	RD	163164152152174174177177g	0.0145541	0.420262	0.0517955	0.00932224
71	RD	163164152152174174177177g	0.0145541	0.420262	0.0517955	0.00932224
72	RD	163164152152174174178178g	0.0145541	0.420262	0.0517955	0.00171225
73	RD	163164152152174174178178g	0.0145541	0.420262	0.0517955	0.00171225
74	RD	163164152152174174178178g	0.0145541	0.420262	0.0517955	0.00171225
75	RD	163164152152174174178178g	0.0145541	0.420262	0.0517955	0.00171225
76	RD	163168152152174174182190g	0.117289	0.420262	0.0517955	0.0565993
77	RD	163168152152174174182190g	0.117289	0.420262	0.0517955	0.0565993
78	RD	163168152152174174182190g	0.117289	0.420262	0.0517955	0.0565993
79	RD	163168152152174174182190g	0.117289	0.420262	0.0517955	0.0565993
80	RD	160174152152174174182190g	0.00523187	0.420262	0.0517955	0.0565993
81	RD	160174152152174174182190g	0.00523187	0.420262	0.0517955	0.0565993
82	RD	160174152152174174182190g	0.00523187	0.420262	0.0517955	0.0565993
83	RD	160174152152174174182190g	0.00523187	0.420262	0.0517955	0.0565993
84	RD	160174152152174174182190g	0.00523187	0.420262	0.0517955	0.0565993
85	RD	160174152152174174182190g	0.00523187	0.420262	0.0517955	0.0565993
86	RD	163168152153161165182190g	0.117289	0.0760048	0.0234483	0.0565993
87	RD	163168152153161165182190g	0.117289	0.0760048	0.0234483	0.0565993
88	RD	163168152153161165182190g	0.117289	0.0760048	0.0234483	0.0565993
89	RD	163168150152161165182190g	0.117289	0.116243	0.0234483	0.0565993
90	RD	163168150152161165182190g	0.117289	0.116243	0.0234483	0.0565993
91	RD	163168150152161165182190g	0.117289	0.116243	0.0234483	0.0565993
92	RD	163168150152161165182190g	0.117289	0.116243	0.0234483	0.0565993
93	RD	163168150152161165182190g	0.117289	0.116243	0.0234483	0.0565993
94	RD	163168150152161165182190g	0.117289	0.116243	0.0234483	0.0565993
95	RD	163168150152161165182190g	0.117289	0.116243	0.0234483	0.0565993
96	RD	163168150152161165182190g	0.117289	0.116243	0.0234483	0.0565993
97	RD	163168150152159163182182g	0.117289	0.116243	0.00192628	0.0549822
98	RD	163168150152159163182182g	0.117289	0.116243	0.00192628	0.0549822
99	RD	163168150152159163182190g	0.117289	0.116243	0.00192628	0.0565993
100	RD	163168150152159163182190g	0.117289	0.116243	0.00192628	0.0565993
101	RD	163168150152159163182190g	0.117289	0.116243	0.00192628	0.0565993
102	RD	163168150152159163182190g	0.117289	0.116243	0.00192628	0.0565993
103	RD	163168150152159163182190g	0.117289	0.116243	0.00192628	0.0565993
104	RD	163168150152159163182190g	0.117289	0.116243	0.00192628	0.0565993
105	RD	163168150152159163182190g	0.117289	0.116243	0.00192628	0.0565993
106	RD	160174152155166173180185g	0.00523187	0.0223543	0.00475624	0.0165755
107	RD	160174152155166173180185g	0.00523187	0.0223543	0.00475624	0.0165755
108	RD	160174152155166173180185g	0.00523187	0.0223543	0.00475624	0.0165755
109	RD	160174152155166173180185g	0.00523187	0.0223543	0.00475624	0.0165755
110	RD	160174152155166173180185g	0.00523187	0.0223543	0.00475624	0.0165755
111	RD	168168147152168173180185g	0.223175	0.0178835	0.0313912	0.0165755
112	RD	168168147152168173180185g	0.223175	0.0178835	0.0313912	0.0165755
113	RD	168168147152168173180185g	0.223175	0.0178835	0.0313912	0.0165755
114	RD	168168147152168173180185g	0.223175	0.0178835	0.0313912	0.0165755
115	RD	168168152152168173178178g	0.223175	0.420262	0.0313912	0.00171225
116	RD	168168152152168173178178g	0.223175	0.420262	0.0313912	0.00171225
117	RD	168168152152168173180190g	0.223175	0.420262	0.0313912	0.034126
118	RD	168168152152168173180190g	0.223175	0.420262	0.0313912	0.034126
119	RD	168168152152168173180190g	0.223175	0.420262	0.0313912	0.034126
120	RD	168168152152168173180190g	0.223175	0.420262	0.0313912	0.034126
121	RD	168168152152168173180190g	0.223175	0.420262	0.0313912	0.034126
122	RD	168168152152168173180190g	0.223175	0.420262	0.0313912	0.034126
123	RD	168168152152168173180190g	0.223175	0.420262	0.0313912	0.034126
124	RD	168168152152167173177187g	0.223175	0.420262	0.019025	0.0026635
125	RD	168168152152167173177187g	0.223175	0.420262	0.019025	0.0026635
126	RD	168168152152167173177187g	0.223175	0.420262	0.019025	0.0026635
127	RD	168168152152167173177187g	0.223175	0.420262	0.019025	0.0026635
128	RD	168168152152168173180192g	0.223175	0.420262	0.0313912	0.00292509
129	RD	168168152152168173180192g	0.223175	0.420262	0.0313912	0.00292509
130	RD	168168152152168173180192g	0.223175	0.420262	0.0313912	0.00292509
131	RD	166169152153167173183191g	0.00970273	0.0760048	0.019025	0.00684899
132	RD	166169152153167173183191g	0.00970273	0.0760048	0.019025	0.00684899
133	RD	166169152153167173183191g	0.00970273	0.0760048	0.019025	0.00684899
134	RD	166169152153168173183191g	0.00970273	0.0760048	0.0313912	0.00684899
135	RD	166169152153168173183191g	0.00970273	0.0760048	0.0313912	0.00684899
136	RD	166169152153168173183191g	0.00970273	0.0760048	0.0313912	0.00684899
137	RD	166169150154168173182182g	0.00970273	0.0166944	0.0313912	0.0549822
138	RD	166169150154168173182182g	0.00970273	0.0166944	0.0313912	0.0549822
139	RD	166169150154168173182182g	0.00970273	0.0166944	0.0313912	0.0549822
140	RD	166169150154168173182182g	0.00970273	0.0166944	0.0313912	0.0549822
141	RD	164165150154168173182189g	0.00606421	0.0166944	0.0313912	0.00808561
142	RD	164165150154168173182189g	0.00606421	0.0166944	0.0313912	0.00808561
143	RD	164165150154168173182189g	0.00606421	0.0166944	0.0313912	0.00808561
144	RD	164165150154168173182189g	0.00606421	0.0166944	0.0313912	0.00808561
145	RD	164165150154168173182189g	0.00606421	0.0166944	0.0313912	0.00808561
Cumulative Product of Genotype Probability for Increasing Locus Combinations
Sample	Pop	Genotype	1	1+2	1+2+3	1+2+3+4
1	RD	168169152152174174177177g	0.0553864	0.0232768	0.00120563	1.12392e-05
2	RD	168169152152174174177177g	0.0553864	0.0232768	0.00120563	1.12392e-05
3	RD	168169152152174174177177g	0.0553864	0.0232768	0.00120563	1.12392e-05
4	RD	168169152152174174177177g	0.0553864	0.0232768	0.00120563	1.12392e-05
5	RD	168169152152174174177177g	0.0553864	0.0232768	0.00120563	1.12392e-05
6	RD	168169152152174174177177g	0.0553864	0.0232768	0.00120563	1.12392e-05
7	RD	168169152152174174177177g	0.0553864	0.0232768	0.00120563	1.12392e-05
8	RD	166168152152167174180188g	0.0781926	0.0328614	0.00103156	1.30754e-05
9	RD	166168152152167174180188g	0.0781926	0.0328614	0.00103156	1.30754e-05
10	RD	166168152152167174180188g	0.0781926	0.0328614	0.00103156	1.30754e-05
11	RD	166168152152167174180188g	0.0781926	0.0328614	0.00103156	1.30754e-05
12	RD	168168152152167174180188g	0.223175	0.0937918	0.00294424	3.73193e-05
13	RD	168168152152167174180188g	0.223175	0.0937918	0.00294424	3.73193e-05
14	RD	168168152152167174180188g	0.223175	0.0937918	0.00294424	3.73193e-05
15	RD	168168152152167174180188g	0.223175	0.0937918	0.00294424	3.73193e-05
16	RD	168168152152157161180188g	0.223175	0.0937918	0.000758364	9.61256e-06
17	RD	168168152152157161180188g	0.223175	0.0937918	0.000758364	9.61256e-06
18	RD	168168152152157161180188g	0.223175	0.0937918	0.000758364	9.61256e-06
19	RD	168168152152157161180188g	0.223175	0.0937918	0.000758364	9.61256e-06
20	RD	168168152152157161180188g	0.223175	0.0937918	0.000758364	9.61256e-06
21	RD	168168152152171175183185g	0.223175	0.0937918	0.000269888	5.23731e-06
22	RD	168168152152171175183185g	0.223175	0.0937918	0.000269888	5.23731e-06
23	RD	168168152152171175183185g	0.223175	0.0937918	0.000269888	5.23731e-06
24	RD	168168152152171175183185g	0.223175	0.0937918	0.000269888	5.23731e-06
25	RD	168168152152171175183185g	0.223175	0.0937918	0.000269888	5.23731e-06
26	RD	168168152152171175183185g	0.223175	0.0937918	0.000269888	5.23731e-06
27	RD	165165152153161164183183g	0.00267539	0.000203342	2.13739e-06	5.85558e-08
28	RD	165165152153161164183183g	0.00267539	0.000203342	2.13739e-06	5.85558e-08
29	RD	165165152153161164183183g	0.00267539	0.000203342	2.13739e-06	5.85558e-08
30	RD	162168153156161164183183g	0.00977408	1.18544e-05	1.24605e-07	3.41368e-09
31	RD	162168153156161164183183g	0.00977408	1.18544e-05	1.24605e-07	3.41368e-09
32	RD	162168153156161164183183g	0.00977408	1.18544e-05	1.24605e-07	3.41368e-09
33	RD	165165152153161164183183g	0.00267539	0.000203342	2.13739e-06	5.85558e-08
34	RD	165165152153161164183183g	0.00267539	0.000203342	2.13739e-06	5.85558e-08
35	RD	168168152152171175180182g	0.223175	0.0937918	0.000269888	1.78941e-05
36	RD	168168152152171175180182g	0.223175	0.0937918	0.000269888	1.78941e-05
37	RD	168168152152171175180182g	0.223175	0.0937918	0.000269888	1.78941e-05
38	RD	168168152152171175180182g	0.223175	0.0937918	0.000269888	1.78941e-05
39	RD	168168152152171175180182g	0.223175	0.0937918	0.000269888	1.78941e-05
40	RD	168168152152167168181181g	0.223175	0.0937918	0.00147212	1.75044e-06
41	RD	168168152152167168181181g	0.223175	0.0937918	0.00147212	1.75044e-06
42	RD	168168152152167168181181g	0.223175	0.0937918	0.00147212	1.75044e-06
43	RD	168168152152167168181181g	0.223175	0.0937918	0.00147212	1.75044e-06
44	RD	168168152152167168181181g	0.223175	0.0937918	0.00147212	1.75044e-06
45	RD	166166157160157161183183g	0.00684899	4.07193e-06	3.29241e-08	9.01986e-10
46	RD	166166157160157161183183g	0.00684899	4.07193e-06	3.29241e-08	9.01986e-10
47	RD	166166157160157161183183g	0.00684899	4.07193e-06	3.29241e-08	9.01986e-10
48	RD	166166157160157161183183g	0.00684899	4.07193e-06	3.29241e-08	9.01986e-10
49	RD	166166157160157161183183g	0.00684899	4.07193e-06	3.29241e-08	9.01986e-10
50	RD	163164152152174174180182g	0.0145541	0.00611653	0.000316809	2.10051e-05
51	RD	163164152152174174180182g	0.0145541	0.00611653	0.000316809	2.10051e-05
52	RD	163164152152174174180182g	0.0145541	0.00611653	0.000316809	2.10051e-05
53	RD	163164152152174174180182g	0.0145541	0.00611653	0.000316809	2.10051e-05
54	RD	155159145151161164183183g	0.00059453	3.53466e-07	3.71539e-09	1.01787e-10
55	RD	155159145151161164183183g	0.00059453	3.53466e-07	3.71539e-09	1.01787e-10
56	RD	155159145151161164183183g	0.00059453	3.53466e-07	3.71539e-09	1.01787e-10
57	RD	155159145151161164183183g	0.00059453	3.53466e-07	3.71539e-09	1.01787e-10
58	RD	155159145151161164183183g	0.00059453	3.53466e-07	3.71539e-09	1.01787e-10
59	RD	160168154154165165177185g	0.0651605	0.000564828	5.64828e-06	6.39377e-08
60	RD	160168154154165165177185g	0.0651605	0.000564828	5.64828e-06	6.39377e-08
61	RD	160168154154165165182182g	0.0651605	0.000564828	5.64828e-06	3.10555e-07
62	RD	160168154154165165182182g	0.0651605	0.000564828	5.64828e-06	3.10555e-07
63	RD	160168154154165165182182g	0.0651605	0.000564828	5.64828e-06	3.10555e-07
64	RD	160168154154165165182182g	0.0651605	0.000564828	5.64828e-06	3.10555e-07
65	RD	160168154154165165182182g	0.0651605	0.000564828	5.64828e-06	3.10555e-07
66	RD	160168154154165165182182g	0.0651605	0.000564828	5.64828e-06	3.10555e-07
67	RD	160168154154165165182182g	0.0651605	0.000564828	5.64828e-06	3.10555e-07
68	RD	163164152152174174177177g	0.0145541	0.00611653	0.000316809	2.95336e-06
69	RD	163164152152174174177177g	0.0145541	0.00611653	0.000316809	2.95336e-06
70	RD	163164152152174174177177g	0.0145541	0.00611653	0.000316809	2.95336e-06
71	RD	163164152152174174177177g	0.0145541	0.00611653	0.000316809	2.95336e-06
72	RD	163164152152174174178178g	0.0145541	0.00611653	0.000316809	5.42455e-07
73	RD	163164152152174174178178g	0.0145541	0.00611653	0.000316809	5.42455e-07
74	RD	163164152152174174178178g	0.0145541	0.00611653	0.000316809	5.42455e-07
75	RD	163164152152174174178178g	0.0145541	0.00611653	0.000316809	5.42455e-07
76	RD	163168152152174174182190g	0.117289	0.049292	0.0025531	0.000144504
77	RD	163168152152174174182190g	0.117289	0.049292	0.0025531	0.000144504
78	RD	163168152152174174182190g	0.117289	0.049292	0.0025531	0.000144504
79	RD	163168152152174174182190g	0.117289	0.049292	0.0025531	0.000144504
80	RD	160174152152174174182190g	0.00523187	0.00219875	0.000113885	6.44584e-06
81	RD	160174152152174174182190g	0.00523187	0.00219875	0.000113885	6.44584e-06
82	RD	160174152152174174182190g	0.00523187	0.00219875	0.000113885	6.44584e-06
83	RD	160174152152174174182190g	0.00523187	0.00219875	0.000113885	6.44584e-06
84	RD	160174152152174174182190g	0.00523187	0.00219875	0.000113885	6.44584e-06
85	RD	160174152152174174182190g	0.00523187	0.00219875	0.000113885	6.44584e-06
86	RD	163168152153161165182190g	0.117289	0.00891452	0.00020903	1.1831e-05
87	RD	163168152153161165182190g	0.117289	0.00891452	0.00020903	1.1831e-05
88	RD	163168152153161165182190g	0.117289	0.00891452	0.00020903	1.1831e-05
89	RD	163168150152161165182190g	0.117289	0.013634	0.000319693	1.80944e-05
90	RD	163168150152161165182190g	0.117289	0.013634	0.000319693	1.80944e-05
91	RD	163168150152161165182190g	0.117289	0.013634	0.000319693	1.80944e-05
92	RD	163168150152161165182190g	0.117289	0.013634	0.000319693	1.80944e-05
93	RD	163168150152161165182190g	0.117289	0.013634	0.000319693	1.80944e-05
94	RD	163168150152161165182190g	0.117289	0.013634	0.000319693	1.80944e-05
95	RD	163168150152161165182190g	0.117289	0.013634	0.000319693	1.80944e-05
96	RD	163168150152161165182190g	0.117289	0.013634	0.000319693	1.80944e-05
97	RD	163168150152159163182182g	0.117289	0.013634	2.62628e-05	1.44399e-06
98	RD	163168150152159163182182g	0.117289	0.013634	2.62628e-05	1.44399e-06
99	RD	163168150152159163182190g	0.117289	0.013634	2.62628e-05	1.48646e-06
100	RD	163168150152159163182190g	0.117289	0.013634	2.62628e-05	1.48646e-06
101	RD	163168150152159163182190g	0.117289	0.013634	2.62628e-05	1.48646e-06
102	RD	163168150152159163182190g	0.117289	0.013634	2.62628e-05	1.48646e-06
103	RD	163168150152159163182190g	0.117289	0.013634	2.62628e-05	1.48646e-06
104	RD	163168150152159163182190g	0.117289	0.013634	2.62628e-05	1.48646e-06
105	RD	163168150152159163182190g	0.117289	0.013634	2.62628e-05	1.48646e-06
106	RD	160174152155166173180185g	0.00523187	0.000116955	5.56266e-07	9.22039e-09
107	RD	160174152155166173180185g	0.00523187	0.000116955	5.56266e-07	9.22039e-09
108	RD	160174152155166173180185g	0.00523187	0.000116955	5.56266e-07	9.22039e-09
109	RD	160174152155166173180185g	0.00523187	0.000116955	5.56266e-07	9.22039e-09
110	RD	160174152155166173180185g	0.00523187	0.000116955	5.56266e-07	9.22039e-09
111	RD	168168147152168173180185g	0.223175	0.00399114	0.000125287	2.07669e-06
112	RD	168168147152168173180185g	0.223175	0.00399114	0.000125287	2.07669e-06
113	RD	168168147152168173180185g	0.223175	0.00399114	0.000125287	2.07669e-06
114	RD	168168147152168173180185g	0.223175	0.00399114	0.000125287	2.07669e-06
115	RD	168168152152168173178178g	0.223175	0.0937918	0.00294424	5.04126e-06
116	RD	168168152152168173178178g	0.223175	0.0937918	0.00294424	5.04126e-06
117	RD	168168152152168173180190g	0.223175	0.0937918	0.00294424	0.000100475
118	RD	168168152152168173180190g	0.223175	0.0937918	0.00294424	0.000100475
119	RD	168168152152168173180190g	0.223175	0.0937918	0.00294424	0.000100475
120	RD	168168152152168173180190g	0.223175	0.0937918	0.00294424	0.000100475
121	RD	168168152152168173180190g	0.223175	0.0937918	0.00294424	0.000100475
122	RD	168168152152168173180190g	0.223175	0.0937918	0.00294424	0.000100475
123	RD	168168152152168173180190g	0.223175	0.0937918	0.00294424	0.000100475
124	RD	168168152152167173177187g	0.223175	0.0937918	0.00178439	4.7527e-06
125	RD	168168152152167173177187g	0.223175	0.0937918	0.00178439	4.7527e-06
126	RD	168168152152167173177187g	0.223175	0.0937918	0.00178439	4.7527e-06
127	RD	168168152152167173177187g	0.223175	0.0937918	0.00178439	4.7527e-06
128	RD	168168152152168173180192g	0.223175	0.0937918	0.00294424	8.61216e-06
129	RD	168168152152168173180192g	0.223175	0.0937918	0.00294424	8.61216e-06
130	RD	168168152152168173180192g	0.223175	0.0937918	0.00294424	8.61216e-06
131	RD	166169152153167173183191g	0.00970273	0.000737454	1.403e-05	9.60916e-08
132	RD	166169152153167173183191g	0.00970273	0.000737454	1.403e-05	9.60916e-08
133	RD	166169152153167173183191g	0.00970273	0.000737454	1.403e-05	9.60916e-08
134	RD	166169152153168173183191g	0.00970273	0.000737454	2.31496e-05	1.58551e-07
135	RD	166169152153168173183191g	0.00970273	0.000737454	2.31496e-05	1.58551e-07
136	RD	166169152153168173183191g	0.00970273	0.000737454	2.31496e-05	1.58551e-07
137	RD	166169150154168173182182g	0.00970273	0.000161981	5.08479e-06	2.79573e-07
138	RD	166169150154168173182182g	0.00970273	0.000161981	5.08479e-06	2.79573e-07
139	RD	166169150154168173182182g	0.00970273	0.000161981	5.08479e-06	2.79573e-07
140	RD	166169150154168173182182g	0.00970273	0.000161981	5.08479e-06	2.79573e-07
141	RD	164165150154168173182189g	0.00606421	0.000101238	3.178e-06	2.5696e-08
142	RD	164165150154168173182189g	0.00606421	0.000101238	3.178e-06	2.5696e-08
143	RD	164165150154168173182189g	0.00606421	0.000101238	3.178e-06	2.5696e-08
144	RD	164165150154168173182189g	0.00606421	0.000101238	3.178e-06	2.5696e-08
145	RD	164165150154168173182189g	0.00606421	0.000101238	3.178e-06	2.5696e-08
						1.47409e-05
Genotype Probability = Product (pi^2) * Product (2 * pi * pj) = Product(pi^2)^2h
Where for each multilocus genotype, pi is the frequency of the allele at homozygous loci
and pi and pj are the frequencies of alleles at heterozygous loci.
For the equivalent formula, pi is the frequency of each allele in the genotype
and h is the number of heterozygous loci.

## Sheet: MS
Summary of Multilocus Matches Analysis for Codominant Data
Data Sheet	Hoja1
Data Title
No. Loci	4
No. Samples	145
No. Pops.	1
Sorted Multilocus Genotypes with Repeated Matching Multilocus Genotypes Listed First
Sample No.	Sample	Pop	Genotype	No.	Label
58	58	RD	155159145151161164183183g	5	A
57	57	RD	155159145151161164183183g	0	A
56	56	RD	155159145151161164183183g	0	A
55	55	RD	155159145151161164183183g	0	A
54	54	RD	155159145151161164183183g	0	A
60	60	RD	160168154154165165177185g	2	B
59	59	RD	160168154154165165177185g	0	B
67	67	RD	160168154154165165182182g	7	C
66	66	RD	160168154154165165182182g	0	C
65	65	RD	160168154154165165182182g	0	C
64	64	RD	160168154154165165182182g	0	C
63	63	RD	160168154154165165182182g	0	C
62	62	RD	160168154154165165182182g	0	C
61	61	RD	160168154154165165182182g	0	C
85	85	RD	160174152152174174182190g	6	D
84	84	RD	160174152152174174182190g	0	D
83	83	RD	160174152152174174182190g	0	D
82	82	RD	160174152152174174182190g	0	D
81	81	RD	160174152152174174182190g	0	D
80	80	RD	160174152152174174182190g	0	D
110	110	RD	160174152155166173180185g	5	E
109	109	RD	160174152155166173180185g	0	E
108	108	RD	160174152155166173180185g	0	E
107	107	RD	160174152155166173180185g	0	E
106	106	RD	160174152155166173180185g	0	E
32	32	RD	162168153156161164183183g	3	F
31	31	RD	162168153156161164183183g	0	F
30	30	RD	162168153156161164183183g	0	F
71	71	RD	163164152152174174177177g	4	G
70	70	RD	163164152152174174177177g	0	G
69	69	RD	163164152152174174177177g	0	G
68	68	RD	163164152152174174177177g	0	G
75	75	RD	163164152152174174178178g	4	H
74	74	RD	163164152152174174178178g	0	H
73	73	RD	163164152152174174178178g	0	H
72	72	RD	163164152152174174178178g	0	H
53	53	RD	163164152152174174180182g	4	I
52	52	RD	163164152152174174180182g	0	I
51	51	RD	163164152152174174180182g	0	I
50	50	RD	163164152152174174180182g	0	I
98	98	RD	163168150152159163182182g	2	J
97	97	RD	163168150152159163182182g	0	J
105	105	RD	163168150152159163182190g	7	K
104	104	RD	163168150152159163182190g	0	K
103	103	RD	163168150152159163182190g	0	K
102	102	RD	163168150152159163182190g	0	K
101	101	RD	163168150152159163182190g	0	K
100	100	RD	163168150152159163182190g	0	K
99	99	RD	163168150152159163182190g	0	K
96	96	RD	163168150152161165182190g	8	L
95	95	RD	163168150152161165182190g	0	L
94	94	RD	163168150152161165182190g	0	L
93	93	RD	163168150152161165182190g	0	L
92	92	RD	163168150152161165182190g	0	L
91	91	RD	163168150152161165182190g	0	L
90	90	RD	163168150152161165182190g	0	L
89	89	RD	163168150152161165182190g	0	L
79	79	RD	163168152152174174182190g	4	M
78	78	RD	163168152152174174182190g	0	M
77	77	RD	163168152152174174182190g	0	M
76	76	RD	163168152152174174182190g	0	M
88	88	RD	163168152153161165182190g	3	N
87	87	RD	163168152153161165182190g	0	N
86	86	RD	163168152153161165182190g	0	N
145	145	RD	164165150154168173182189g	5	O
144	144	RD	164165150154168173182189g	0	O
143	143	RD	164165150154168173182189g	0	O
142	142	RD	164165150154168173182189g	0	O
141	141	RD	164165150154168173182189g	0	O
34	34	RD	165165152153161164183183g	5	P
33	33	RD	165165152153161164183183g	0	P
29	29	RD	165165152153161164183183g	0	P
28	28	RD	165165152153161164183183g	0	P
27	27	RD	165165152153161164183183g	0	P
49	49	RD	166166157160157161183183g	5	Q
48	48	RD	166166157160157161183183g	0	Q
47	47	RD	166166157160157161183183g	0	Q
46	46	RD	166166157160157161183183g	0	Q
45	45	RD	166166157160157161183183g	0	Q
11	11	RD	166168152152167174180188g	4	R
10	10	RD	166168152152167174180188g	0	R
9	9	RD	166168152152167174180188g	0	R
8	8	RD	166168152152167174180188g	0	R
140	140	RD	166169150154168173182182g	4	S
139	139	RD	166169150154168173182182g	0	S
138	138	RD	166169150154168173182182g	0	S
137	137	RD	166169150154168173182182g	0	S
133	133	RD	166169152153167173183191g	3	T
132	132	RD	166169152153167173183191g	0	T
131	131	RD	166169152153167173183191g	0	T
136	136	RD	166169152153168173183191g	3	U
135	135	RD	166169152153168173183191g	0	U
134	134	RD	166169152153168173183191g	0	U
114	114	RD	168168147152168173180185g	4	V
113	113	RD	168168147152168173180185g	0	V
112	112	RD	168168147152168173180185g	0	V
111	111	RD	168168147152168173180185g	0	V
20	20	RD	168168152152157161180188g	5	W
19	19	RD	168168152152157161180188g	0	W
18	18	RD	168168152152157161180188g	0	W
17	17	RD	168168152152157161180188g	0	W
16	16	RD	168168152152157161180188g	0	W
44	44	RD	168168152152167168181181g	5	X
43	43	RD	168168152152167168181181g	0	X
42	42	RD	168168152152167168181181g	0	X
41	41	RD	168168152152167168181181g	0	X
40	40	RD	168168152152167168181181g	0	X
127	127	RD	168168152152167173177187g	4	Y
126	126	RD	168168152152167173177187g	0	Y
125	125	RD	168168152152167173177187g	0	Y
124	124	RD	168168152152167173177187g	0	Y
15	15	RD	168168152152167174180188g	4	Z
14	14	RD	168168152152167174180188g	0	Z
13	13	RD	168168152152167174180188g	0	Z
12	12	RD	168168152152167174180188g	0	Z
116	116	RD	168168152152168173178178g	2	AA
115	115	RD	168168152152168173178178g	0	AA
123	123	RD	168168152152168173180190g	7	BB
122	122	RD	168168152152168173180190g	0	BB
121	121	RD	168168152152168173180190g	0	BB
120	120	RD	168168152152168173180190g	0	BB
119	119	RD	168168152152168173180190g	0	BB
118	118	RD	168168152152168173180190g	0	BB
117	117	RD	168168152152168173180190g	0	BB
130	130	RD	168168152152168173180192g	3	CC
129	129	RD	168168152152168173180192g	0	CC
128	128	RD	168168152152168173180192g	0	CC
39	39	RD	168168152152171175180182g	5	DD
38	38	RD	168168152152171175180182g	0	DD
37	37	RD	168168152152171175180182g	0	DD
36	36	RD	168168152152171175180182g	0	DD
35	35	RD	168168152152171175180182g	0	DD
26	26	RD	168168152152171175183185g	6	EE
25	25	RD	168168152152171175183185g	0	EE
24	24	RD	168168152152171175183185g	0	EE
23	23	RD	168168152152171175183185g	0	EE
22	22	RD	168168152152171175183185g	0	EE
21	21	RD	168168152152171175183185g	0	EE
7	7	RD	168169152152174174177177g	7	FF
6	6	RD	168169152152174174177177g	0	FF
5	5	RD	168169152152174174177177g	0	FF
4	4	RD	168169152152174174177177g	0	FF
3	3	RD	168169152152174174177177g	0	FF
2	2	RD	168169152152174174177177g	0	FF
1	1	RD	168169152152174174177177g	0	FF

## Sheet: P1X
Probability of Exclusion (P1=Both parents known) for each Locus and for Increasing Combinations of the 4 Loci
Data Sheet	Hoja1
Data Title
No. Loci	4
No. Samples	145
No. Pops.	1
P1 for Increasing Locus Combinations
Pop	N	1	1+2	1+2+3	1+2+3+4
RD	145	0.563036	0.725816	0.934405	0.982355
P1Max for Increasing Locus Combinations
Pop	N	1	1+2	1+2+3	1+2+3+4
RD	145	0.813469	0.965206	0.994517	0.999136
P1 by Locus
Pop	N	166	181	182	207
RD	145	0.563036	0.372525	0.760764	0.731
P1Max by Locus
Pop	N	166	181	182	207
RD	145	0.813469	0.813469	0.842407	0.842407
P1 = Probability of Exclusion (Both Parents Known)
Estimates the probability of exclusion when the genotypes of both parents are known.
See GenAlEx Appendix 1 for formula.

## Sheet: P2X
Probability of Exclusion (P2-Only one parent known) for each Locus and for Increasing Combinations of the 4 Loci
Data Sheet	Hoja1
Data Title
No. Loci	4
No. Samples	145
No. Pops.	1
P2 for Increasing Locus Combinations
Pop	N	1	1+2	1+2+3	1+2+3+4
RD	145	0.374588	0.492672	0.803515	0.916325
P2Max for Increasing Locus Combinations
Pop	N	1	1+2	1+2+3	1+2+3+4
RD	145	0.683696	0.899952	0.972631	0.992513
P2 by Locus
Pop	N	166	181	182	207
RD	145	0.374588	0.188809	0.612706	0.57414
P2Max by Locus
Pop	N	166	181	182	207
RD	145	0.683696	0.683696	0.726445	0.726445
P2 = Probability of Exclusion (Only One Parent Known)
Estimates the probability of exclusion when the genotypes of only one parent is known.
See GenAlEx Appendix 1 for formula.

## Sheet: P3X
Probability of Exclusion (P3-Exclude both parents) for each Locus and for Increasing Combinations of the 4 Loci
Data Sheet	Hoja1
Data Title
No. Loci	4
No. Samples	145
No. Pops.	1
P3 for Increasing Locus Combinations
Pop	N	1	1+2	1+2+3	1+2+3+4
RD	145	0.77605	0.906498	0.991932	0.999136
P3Max for Increasing Locus Combinations
Pop	N	1	1+2	1+2+3	1+2+3+4
RD	145	0.942745	0.996722	0.999862	0.999994
P3 by Locus
Pop	N	166	181	182	207
RD	145	0.77605	0.582489	0.913718	0.892928
P3Max by Locus
Pop	N	166	181	182	207
RD	145	0.942745	0.942745	0.958047	0.958047
P3 = Probability of Exclusion (Exclude Both Parents)
Estimates the probability of excluding two putative parents.
See GenAlEx Appendix 1 for formula.

## Sheet: DS
4	32
	Hoja1	Data Subset Without Repeated Matching Multilocus Genotypes
Sample	Pop	166		181		182		207			No. Matches
7	RD	168	169	152	152	174	174	177	177		7
11	RD	166	168	152	152	167	174	180	188		4
15	RD	168	168	152	152	167	174	180	188		4
20	RD	168	168	152	152	157	161	180	188		5
26	RD	168	168	152	152	171	175	183	185		6
32	RD	162	168	153	156	161	164	183	183		3
34	RD	165	165	152	153	161	164	183	183		5
39	RD	168	168	152	152	171	175	180	182		5
44	RD	168	168	152	152	167	168	181	181		5
49	RD	166	166	157	160	157	161	183	183		5
53	RD	163	164	152	152	174	174	180	182		4
58	RD	155	159	145	151	161	164	183	183		5
60	RD	160	168	154	154	165	165	177	185		2
67	RD	160	168	154	154	165	165	182	182		7
71	RD	163	164	152	152	174	174	177	177		4
75	RD	163	164	152	152	174	174	178	178		4
79	RD	163	168	152	152	174	174	182	190		4
85	RD	160	174	152	152	174	174	182	190		6
88	RD	163	168	152	153	161	165	182	190		3
96	RD	163	168	150	152	161	165	182	190		8
98	RD	163	168	150	152	159	163	182	182		2
105	RD	163	168	150	152	159	163	182	190		7
110	RD	160	174	152	155	166	173	180	185		5
114	RD	168	168	147	152	168	173	180	185		4
116	RD	168	168	152	152	168	173	178	178		2
123	RD	168	168	152	152	168	173	180	190		7
127	RD	168	168	152	152	167	173	177	187		4
130	RD	168	168	152	152	168	173	180	192		3
133	RD	166	169	152	153	167	173	183	191		3
136	RD	166	169	152	153	168	173	183	191		3
140	RD	166	169	150	154	168	173	182	182		4
145	RD	164	165	150	154	168	173	182	189		5

## Sheet: MDS
4	145
	Hoja1	Data Subset of Repeated Matching Multilocus Genotypes
Sample	Pop	166		181		182		207			No. Matches	Label
1	RD	168	169	152	152	174	174	177	177		0	FF
2	RD	168	169	152	152	174	174	177	177		0	FF
3	RD	168	169	152	152	174	174	177	177		0	FF
4	RD	168	169	152	152	174	174	177	177		0	FF
5	RD	168	169	152	152	174	174	177	177		0	FF
6	RD	168	169	152	152	174	174	177	177		0	FF
7	RD	168	169	152	152	174	174	177	177		7	FF
8	RD	166	168	152	152	167	174	180	188		0	R
9	RD	166	168	152	152	167	174	180	188		0	R
10	RD	166	168	152	152	167	174	180	188		0	R
11	RD	166	168	152	152	167	174	180	188		4	R
12	RD	168	168	152	152	167	174	180	188		0	Z
13	RD	168	168	152	152	167	174	180	188		0	Z
14	RD	168	168	152	152	167	174	180	188		0	Z
15	RD	168	168	152	152	167	174	180	188		4	Z
16	RD	168	168	152	152	157	161	180	188		0	W
17	RD	168	168	152	152	157	161	180	188		0	W
18	RD	168	168	152	152	157	161	180	188		0	W
19	RD	168	168	152	152	157	161	180	188		0	W
20	RD	168	168	152	152	157	161	180	188		5	W
21	RD	168	168	152	152	171	175	183	185		0	EE
22	RD	168	168	152	152	171	175	183	185		0	EE
23	RD	168	168	152	152	171	175	183	185		0	EE
24	RD	168	168	152	152	171	175	183	185		0	EE
25	RD	168	168	152	152	171	175	183	185		0	EE
26	RD	168	168	152	152	171	175	183	185		6	EE
27	RD	165	165	152	153	161	164	183	183		0	P
28	RD	165	165	152	153	161	164	183	183		0	P
29	RD	165	165	152	153	161	164	183	183		0	P
30	RD	162	168	153	156	161	164	183	183		0	F
31	RD	162	168	153	156	161	164	183	183		0	F
32	RD	162	168	153	156	161	164	183	183		3	F
33	RD	165	165	152	153	161	164	183	183		0	P
34	RD	165	165	152	153	161	164	183	183		5	P
35	RD	168	168	152	152	171	175	180	182		0	DD
36	RD	168	168	152	152	171	175	180	182		0	DD
37	RD	168	168	152	152	171	175	180	182		0	DD
38	RD	168	168	152	152	171	175	180	182		0	DD
39	RD	168	168	152	152	171	175	180	182		5	DD
40	RD	168	168	152	152	167	168	181	181		0	X
41	RD	168	168	152	152	167	168	181	181		0	X
42	RD	168	168	152	152	167	168	181	181		0	X
43	RD	168	168	152	152	167	168	181	181		0	X
44	RD	168	168	152	152	167	168	181	181		5	X
45	RD	166	166	157	160	157	161	183	183		0	Q
46	RD	166	166	157	160	157	161	183	183		0	Q
47	RD	166	166	157	160	157	161	183	183		0	Q
48	RD	166	166	157	160	157	161	183	183		0	Q
49	RD	166	166	157	160	157	161	183	183		5	Q
50	RD	163	164	152	152	174	174	180	182		0	I
51	RD	163	164	152	152	174	174	180	182		0	I
52	RD	163	164	152	152	174	174	180	182		0	I
53	RD	163	164	152	152	174	174	180	182		4	I
54	RD	155	159	145	151	161	164	183	183		0	A
55	RD	155	159	145	151	161	164	183	183		0	A
56	RD	155	159	145	151	161	164	183	183		0	A
57	RD	155	159	145	151	161	164	183	183		0	A
58	RD	155	159	145	151	161	164	183	183		5	A
59	RD	160	168	154	154	165	165	177	185		0	B
60	RD	160	168	154	154	165	165	177	185		2	B
61	RD	160	168	154	154	165	165	182	182		0	C
62	RD	160	168	154	154	165	165	182	182		0	C
63	RD	160	168	154	154	165	165	182	182		0	C
64	RD	160	168	154	154	165	165	182	182		0	C
65	RD	160	168	154	154	165	165	182	182		0	C
66	RD	160	168	154	154	165	165	182	182		0	C
67	RD	160	168	154	154	165	165	182	182		7	C
68	RD	163	164	152	152	174	174	177	177		0	G
69	RD	163	164	152	152	174	174	177	177		0	G
70	RD	163	164	152	152	174	174	177	177		0	G
71	RD	163	164	152	152	174	174	177	177		4	G
72	RD	163	164	152	152	174	174	178	178		0	H
73	RD	163	164	152	152	174	174	178	178		0	H
74	RD	163	164	152	152	174	174	178	178		0	H
75	RD	163	164	152	152	174	174	178	178		4	H
76	RD	163	168	152	152	174	174	182	190		0	M
77	RD	163	168	152	152	174	174	182	190		0	M
78	RD	163	168	152	152	174	174	182	190		0	M
79	RD	163	168	152	152	174	174	182	190		4	M
80	RD	160	174	152	152	174	174	182	190		0	D
81	RD	160	174	152	152	174	174	182	190		0	D
82	RD	160	174	152	152	174	174	182	190		0	D
83	RD	160	174	152	152	174	174	182	190		0	D
84	RD	160	174	152	152	174	174	182	190		0	D
85	RD	160	174	152	152	174	174	182	190		6	D
86	RD	163	168	152	153	161	165	182	190		0	N
87	RD	163	168	152	153	161	165	182	190		0	N
88	RD	163	168	152	153	161	165	182	190		3	N
89	RD	163	168	150	152	161	165	182	190		0	L
90	RD	163	168	150	152	161	165	182	190		0	L
91	RD	163	168	150	152	161	165	182	190		0	L
92	RD	163	168	150	152	161	165	182	190		0	L
93	RD	163	168	150	152	161	165	182	190		0	L
94	RD	163	168	150	152	161	165	182	190		0	L
95	RD	163	168	150	152	161	165	182	190		0	L
96	RD	163	168	150	152	161	165	182	190		8	L
97	RD	163	168	150	152	159	163	182	182		0	J
98	RD	163	168	150	152	159	163	182	182		2	J
99	RD	163	168	150	152	159	163	182	190		0	K
100	RD	163	168	150	152	159	163	182	190		0	K
101	RD	163	168	150	152	159	163	182	190		0	K
102	RD	163	168	150	152	159	163	182	190		0	K
103	RD	163	168	150	152	159	163	182	190		0	K
104	RD	163	168	150	152	159	163	182	190		0	K
105	RD	163	168	150	152	159	163	182	190		7	K
106	RD	160	174	152	155	166	173	180	185		0	E
107	RD	160	174	152	155	166	173	180	185		0	E
108	RD	160	174	152	155	166	173	180	185		0	E
109	RD	160	174	152	155	166	173	180	185		0	E
110	RD	160	174	152	155	166	173	180	185		5	E
111	RD	168	168	147	152	168	173	180	185		0	V
112	RD	168	168	147	152	168	173	180	185		0	V
113	RD	168	168	147	152	168	173	180	185		0	V
114	RD	168	168	147	152	168	173	180	185		4	V
115	RD	168	168	152	152	168	173	178	178		0	AA
116	RD	168	168	152	152	168	173	178	178		2	AA
117	RD	168	168	152	152	168	173	180	190		0	BB
118	RD	168	168	152	152	168	173	180	190		0	BB
119	RD	168	168	152	152	168	173	180	190		0	BB
120	RD	168	168	152	152	168	173	180	190		0	BB
121	RD	168	168	152	152	168	173	180	190		0	BB
122	RD	168	168	152	152	168	173	180	190		0	BB
123	RD	168	168	152	152	168	173	180	190		7	BB
124	RD	168	168	152	152	167	173	177	187		0	Y
125	RD	168	168	152	152	167	173	177	187		0	Y
126	RD	168	168	152	152	167	173	177	187		0	Y
127	RD	168	168	152	152	167	173	177	187		4	Y
128	RD	168	168	152	152	168	173	180	192		0	CC
129	RD	168	168	152	152	168	173	180	192		0	CC
130	RD	168	168	152	152	168	173	180	192		3	CC
131	RD	166	169	152	153	167	173	183	191		0	T
132	RD	166	169	152	153	167	173	183	191		0	T
133	RD	166	169	152	153	167	173	183	191		3	T
134	RD	166	169	152	153	168	173	183	191		0	U
135	RD	166	169	152	153	168	173	183	191		0	U
136	RD	166	169	152	153	168	173	183	191		3	U
137	RD	166	169	150	154	168	173	182	182		0	S
138	RD	166	169	150	154	168	173	182	182		0	S
139	RD	166	169	150	154	168	173	182	182		0	S
140	RD	166	169	150	154	168	173	182	182		4	S
141	RD	164	165	150	154	168	173	182	189		0	O
142	RD	164	165	150	154	168	173	182	189		0	O
143	RD	164	165	150	154	168	173	182	189		0	O
144	RD	164	165	150	154	168	173	182	189		0	O
145	RD	164	165	150	154	168	173	182	189		5	O

## Sheet: MLS
Summary of Multilocus Matches by Locus for Increasing Combinations of the 4 Loci for Codominant Data
Data Sheet	Hoja1
Data Title
No. Loci	4
No. Samples	145
No. Pops.	1
Matching versus Unique Genotypes/Locus Combination for all 145 Samples
	#With matching genotype	#With unique genotype	#Matching but 1 locus	#Matching but 2 loci	#Matching but 3 loci
1	145	0	0	0	0
1+2	145	0	123	0	0
1+2+3	145	0	113	136	0
1+2+3+4	145	0	100	123	143
No. Pairwise Matching Genotypes versus Unique Genotypes for all Pairwise Combinations of Samples
	#Matching	#Unique
1	1538	8902
1+2	1189	9251
1+2+3	441	9999
1+2+3+4	294	10146
No. Pairwise Identical Genotype Matches/Locus Combination for all Pairwise Combinations of Samples
	No match	Match 1 Locus	Match 2 Locus	Match 3 Locus	Match 4 Locus
1	8902	1538
1+2	7052	2199	1189
1+2+3	6753	2080	1166	441
1+2+3+4	6510	2127	1185	324	294

[truncated: 6 more sheets: MAL, ML2, HFL, AFL, PCA, PCA (2)]
