# Supplementary material for: Assessing and genotyping threatened staghorn coral Acropora cervicornis nurseries during restoration in southeast Dominican Republic
Source: PeerJ. 2020 Apr 17;8:e8863. doi: 10.7717/peerj.8863 (PMC7169967; doi:10.7717/peerj.8863)
Supplement: Supplemental Information 6 [file peerj-08-8863-s006.xls]

## Sheet: Sheet3
4	145	3	60	70	15
			ROPE	FRAME	DOME
CODE	SITE	166		181		182		207
1	ROPE	169	168	152	152	174	174	177	177
2	ROPE	168	166	152	152	178	174	175	175
3	ROPE	168	165	156	153	178	174	192	177
4	ROPE	168	166	153	152	174	167	190	180
5	ROPE	168	166	152	152	174	167	193	177
6	ROPE	168	166	152	152	174	167	176	176
7	ROPE	168	166	152	152	174	167	190	180
8	ROPE	168	166	152	152	174	167	188	180
9	ROPE	168	166	152	152	174	167	188	180
10	ROPE	168	166	152	152	174	167	188	180
11	ROPE	168	165	152	152	174	167	188	180
12	ROPE	168	168	152	152	174	167	188	180
13	ROPE	168	168	152	152	161	157	188	180
14	ROPE	168	168	152	152	161	157	188	177
15	ROPE	169	166	152	152	161	157	188	177
16	ROPE	168	168	152	152	163	163	188	177
17	ROPE	169	166	152	152	163	163	185	183
18	ROPE	170	168	152	152	163	163	185	183
19	ROPE	168	165	152	152	163	163	185	183
20	ROPE	168	168	152	152	163	163	185	183
21	ROPE	168	168	152	152	175	171	185	183
22	ROPE	168	168	152	152	175	171	185	183
23	ROPE	168	168	152	152	175	171	182	180
24	ROPE	168	168	152	152	175	171	182	180
25	ROPE	168	168	152	152	175	171	182	180
26	ROPE	168	168	152	152	164	161	182	180
27	ROPE	170	168	152	152	164	161	182	180
28	ROPE	168	162	156	153	164	161	183	183
29	ROPE	165	165	153	152	164	161	183	183
30	ROPE	168	168	152	152	164	161	183	183
31	ROPE	159	155	151	145	164	161	183	183
32	ROPE	160	157	150	145	164	163	181	181
33	ROPE	158	155	154	151	165	164	181	181
34	ROPE	168	168	152	152	165	163	181	181
35	ROPE	168	168	152	152	168	167	181	181
36	ROPE	168	168	152	152	165	165	181	181
37	ROPE	170	168	157	152	175	171	181	181
38	ROPE	168	162	152	147	175	171	181	181
39	ROPE	165	165	150	150	175	171	181	181
40	ROPE	168	168	152	152	175	171	181	181
41	ROPE	159	155	151	145	175	171	183	182
42	ROPE	160	157	151	151	161	157	183	183
43	ROPE	158	155	145	145	161	157	183	183
44	ROPE	168	168	152	152	161	157	183	183
45	ROPE	166	166	160	157	161	157	183	183
46	ROPE	163	158	162	150	161	157	183	183
47	ROPE	166	166	160	157	161	157	183	183
48	ROPE	168	163	160	157	161	157	183	183
49	ROPE	168	168	160	157	161	157	183	183
50	ROPE	166	166	160	157	168	167	183	183
51	ROPE	167	167	154	154	165	165	183	183
52	ROPE	167	164	160	157	165	165	183	183
53	ROPE	171	167	160	157	165	165	180	180
54	ROPE	175	163	160	157	165	165	180	180
55	ROPE	167	164	154	154	165	165	180	180
56	ROPE	164	164	154	154	165	165	180	180
57	ROPE	167	167	154	154	165	165	180	180
58	ROPE	171	164	154	154	165	165	185	177
59	ROPE	168	160	154	154	165	165	185	177
60	ROPE	168	160	154	154	165	165	185	177
61	FRAME	168	160	154	154	165	165	182	182
62	FRAME	168	160	154	154	165	165	182	182
63	FRAME	168	160	154	154	165	165	182	182
64	FRAME	168	160	152	152	174	174	178	178
65	FRAME	168	160	152	152	174	174	182	180
66	FRAME	165	163	156	153	174	174	182	180
67	FRAME	170	163	153	152	174	174	182	180
68	FRAME	164	163	152	152	174	174	182	180
69	FRAME	164	163	152	152	174	174	182	180
70	FRAME	164	163	152	152	174	174	178	178
71	FRAME	164	163	152	152	174	174	177	177
72	FRAME	164	163	152	152	174	174	178	178
73	FRAME	164	163	152	152	174	174	178	178
74	FRAME	164	163	152	152	174	174	175	175
75	FRAME	164	163	152	152	174	174	195	182
76	FRAME	168	163	152	152	174	174	190	182
77	FRAME	168	163	152	152	174	174	190	182
78	FRAME	168	163	152	152	174	174	190	182
79	FRAME	168	168	152	152	163	162	190	182
80	FRAME	174	160	152	152	174	174	190	182
81	FRAME	174	160	152	152	174	174	190	182
82	FRAME	174	160	152	152	174	174	182	182
83	FRAME	168	163	152	152	174	174	190	182
84	FRAME	168	163	152	152	165	161	190	182
85	FRAME	168	163	156	153	165	161	182	182
86	FRAME	168	163	153	152	165	161	190	182
87	FRAME	168	163	153	152	165	161	190	182
88	FRAME	168	163	153	152	165	161	190	182
89	FRAME	168	163	152	150	165	161	190	182
90	FRAME	168	163	152	150	165	161	190	182
91	FRAME	168	163	152	150	165	161	190	182
92	FRAME	168	163	152	150	165	161	190	182
93	FRAME	168	163	152	150	165	161	190	190
94	FRAME	168	163	152	150	165	161	190	182
95	FRAME	168	163	152	150	165	161	190	182
96	FRAME	168	163	152	150	165	161	182	182
97	FRAME	168	163	152	150	163	159	182	182
98	FRAME	168	163	152	150	163	159	182	182
99	FRAME	168	163	152	150	163	159	190	182
100	FRAME	168	163	152	150	163	159	190	190
101	FRAME	168	163	152	150	163	159	190	182
102	FRAME	168	163	152	150	163	150	190	182
103	FRAME	168	163	152	150	163	160	182	182
104	FRAME	168	163	152	150	170	168	182	182
105	FRAME	174	160	156	153	173	170	182	182
106	FRAME	174	160	155	152	173	166	185	180
107	FRAME	174	160	153	150	173	166	180	180
108	FRAME	168	163	152	147	163	157	185	180
109	FRAME	168	163	152	147	173	157	185	180
110	FRAME	168	163	152	147	173	168	185	180
111	FRAME	168	168	152	147	173	168	185	180
112	FRAME	168	168	152	147	173	168	184	177
113	FRAME	168	168	152	147	173	168	178	175
114	FRAME	168	168	152	147	173	168	178	178
115	FRAME	168	168	152	152	173	168	178	178
116	FRAME	168	168	152	152	173	168	181	181
117	FRAME	168	168	152	152	173	168	190	180
118	FRAME	168	168	152	152	173	168	190	180
119	FRAME	168	168	152	152	173	173	187	179
120	FRAME	168	168	152	152	154	154	187	179
121	FRAME	168	168	152	152	168	168	186	177
122	FRAME	168	168	152	152	157	157	181	181
123	FRAME	168	168	152	152	157	157	188	181
124	FRAME	168	168	152	152	173	167	187	177
125	FRAME	168	168	152	152	173	167	187	177
126	FRAME	168	168	152	152	173	167	187	177
127	FRAME	168	168	152	152	173	167	192	180
128	FRAME	168	168	152	152	173	168	192	180
129	FRAME	168	168	152	152	173	168	192	180
130	FRAME	169	166	152	152	173	167	191	182
131	DOME	168	168	152	152	173	167	182	182
132	DOME	169	166	153	152	173	167	191	183
133	DOME	169	166	153	152	173	167	191	183
134	DOME	169	166	153	152	173	168	191	183
135	DOME	169	166	153	152	173	168	191	183
136	DOME	169	166	153	152	173	168	191	183
137	DOME	169	166	154	150	173	168	182	182
138	DOME	169	166	154	150	173	168	188	183
139	DOME	169	166	154	150	173	168	182	182
140	DOME	169	166	154	150	173	168	182	182
141	DOME	165	164	154	150	173	168	189	182
142	DOME	165	163	154	150	173	168	182	182
143	DOME	165	162	154	150	173	168	188	188
144	DOME	165	160	152	151	173	168	188	183
145	DOME	165	165	152	152	173	168	188	183

## Sheet: AFP
Allele Frequencies by Population for Codominant Data
Data Sheet	Sheet3
Data Title
No. Loci	4
No. Samples	145
No. Pops.	3
Allele Frequencies and Sample Size by Populations
Locus	Allele/n	ROPE	FRAME	DOME
166	N	60	70	15
	155	0.03333	0	0
	157	0.01667	0	0
	158	0.025	0	0
	159	0.01667	0	0
	160	0.03333	0.07857	0.03333
	162	0.01667	0	0.03333
	163	0.025	0.27143	0.03333
	164	0.04167	0.05714	0.03333
	165	0.05833	0.00714	0.2
	166	0.13333	0.00714	0.3
	167	0.05833	0	0
	168	0.46667	0.52143	0.06667
	169	0.025	0.00714	0.3
	170	0.025	0.00714	0
	171	0.01667	0	0
	174	0	0.04286	0
	175	0.00833	0	0
181	N	60	70	15
	145	0.04167	0	0
	147	0.00833	0.05	0
	150	0.03333	0.12143	0.23333
	151	0.04167	0	0.03333
	152	0.55	0.7	0.33333
	153	0.03333	0.05714	0.16667
	154	0.125	0.04286	0.23333
	155	0	0.00714	0
	156	0.01667	0.02143	0
	157	0.075	0	0
	160	0.06667	0	0
	162	0.00833	0	0
182	N	60	70	15
	150	0	0.00714	0
	154	0	0.01429	0
	157	0.09167	0.04286	0
	159	0	0.03571	0
	160	0	0.00714	0
	161	0.14167	0.09286	0
	162	0	0.00714	0
	163	0.1	0.06429	0
	164	0.06667	0	0
	165	0.2	0.13571	0
	166	0	0.01429	0
	167	0.09167	0.03571	0.1
	168	0.01667	0.1	0.4
	170	0	0.01429	0
	171	0.08333	0	0
	173	0	0.15714	0.5
	174	0.10833	0.27143	0
	175	0.08333	0	0
	178	0.01667	0	0
207	N	60	70	15
	175	0.01667	0.02143	0
	176	0.01667	0	0
	177	0.08333	0.05	0
	178	0	0.09286	0
	179	0	0.01429	0
	180	0.19167	0.12143	0
	181	0.15	0.03571	0
	182	0.05	0.35	0.36667
	183	0.30833	0	0.26667
	184	0	0.00714	0
	185	0.075	0.03571	0
	186	0	0.00714	0
	187	0	0.03571	0
	188	0.075	0.00714	0.16667
	189	0	0	0.03333
	190	0.01667	0.18571	0
	191	0	0.00714	0.16667
	192	0.00833	0.02143	0
	193	0.00833	0	0
	195	0	0.00714	0

## Sheet: AGL
Allele Frequencies by Population with Graph over Loci for Codominant Data
Data Sheet	Sheet3
Data Title
No. Loci	4
No. Samples	145
No. Pops.	3
Allele Frequencies by Populations
Locus	Allele	ROPE	FRAME	DOME
166	155	0.03333	0	0
	157	0.01667	0	0
	158	0.025	0	0
	159	0.01667	0	0
	160	0.03333	0.07857	0.03333
	162	0.01667	0	0.03333
	163	0.025	0.27143	0.03333
	164	0.04167	0.05714	0.03333
	165	0.05833	0.00714	0.2
	166	0.13333	0.00714	0.3
	167	0.05833	0	0
	168	0.46667	0.52143	0.06667
	169	0.025	0.00714	0.3
	170	0.025	0.00714	0
	171	0.01667	0	0
	174	0	0.04286	0
	175	0.00833	0	0
181	145	0.04167	0	0
	147	0.00833	0.05	0
	150	0.03333	0.12143	0.23333
	151	0.04167	0	0.03333
	152	0.55	0.7	0.33333
	153	0.03333	0.05714	0.16667
	154	0.125	0.04286	0.23333
	155	0	0.00714	0
	156	0.01667	0.02143	0
	157	0.075	0	0
	160	0.06667	0	0
	162	0.00833	0	0
182	150	0	0.00714	0
	154	0	0.01429	0
	157	0.09167	0.04286	0
	159	0	0.03571	0
	160	0	0.00714	0
	161	0.14167	0.09286	0
	162	0	0.00714	0
	163	0.1	0.06429	0
	164	0.06667	0	0
	165	0.2	0.13571	0
	166	0	0.01429	0
	167	0.09167	0.03571	0.1
	168	0.01667	0.1	0.4
	170	0	0.01429	0
	171	0.08333	0	0
	173	0	0.15714	0.5
	174	0.10833	0.27143	0
	175	0.08333	0	0
	178	0.01667	0	0
207	175	0.01667	0.02143	0
	176	0.01667	0	0
	177	0.08333	0.05	0
	178	0	0.09286	0
	179	0	0.01429	0
	180	0.19167	0.12143	0
	181	0.15	0.03571	0
	182	0.05	0.35	0.36667
	183	0.30833	0	0.26667
	184	0	0.00714	0
	185	0.075	0.03571	0
	186	0	0.00714	0
	187	0	0.03571	0
	188	0.075	0.00714	0.16667
	189	0	0	0.03333
	190	0.01667	0.18571	0
	191	0	0.00714	0.16667
	192	0.00833	0.02143	0
	193	0.00833	0	0
	195	0	0.00714	0

## Sheet: AGF
Allele Frequencies with Graphs by Population and Locus for Codominant Data
Data Sheet	Sheet3
Data Title
No. Loci	4
No. Samples	145
No. Pops.	3
Allele Frequencies by Populations For Graph By Locus
Locus	Allele	ROPE	FRAME	DOME
166	155	0.03333	0	0
	157	0.01667	0	0
	158	0.025	0	0
	159	0.01667	0	0
	160	0.03333	0.07857	0.03333
	162	0.01667	0	0.03333
	163	0.025	0.27143	0.03333
	164	0.04167	0.05714	0.03333
	165	0.05833	0.00714	0.2
	166	0.13333	0.00714	0.3
	167	0.05833	0	0
	168	0.46667	0.52143	0.06667
	169	0.025	0.00714	0.3
	170	0.025	0.00714	0
	171	0.01667	0	0
	174	0	0.04286	0
	175	0.00833	0	0
Locus	Allele	ROPE	FRAME	DOME
181	145	0.04167	0	0
	147	0.00833	0.05	0
	150	0.03333	0.12143	0.23333
	151	0.04167	0	0.03333
	152	0.55	0.7	0.33333
	153	0.03333	0.05714	0.16667
	154	0.125	0.04286	0.23333
	155	0	0.00714	0
	156	0.01667	0.02143	0
	157	0.075	0	0
	160	0.06667	0	0
	162	0.00833	0	0
Locus	Allele	ROPE	FRAME	DOME
182	150	0	0.00714	0
	154	0	0.01429	0
	157	0.09167	0.04286	0
	159	0	0.03571	0
	160	0	0.00714	0
	161	0.14167	0.09286	0
	162	0	0.00714	0
	163	0.1	0.06429	0
	164	0.06667	0	0
	165	0.2	0.13571	0
	166	0	0.01429	0
	167	0.09167	0.03571	0.1
	168	0.01667	0.1	0.4
	170	0	0.01429	0
	171	0.08333	0	0
	173	0	0.15714	0.5
	174	0.10833	0.27143	0
	175	0.08333	0	0
	178	0.01667	0	0
Locus	Allele	ROPE	FRAME	DOME
207	175	0.01667	0.02143	0
	176	0.01667	0	0
	177	0.08333	0.05	0
	178	0	0.09286	0
	179	0	0.01429	0
	180	0.19167	0.12143	0
	181	0.15	0.03571	0
	182	0.05	0.35	0.36667
	183	0.30833	0	0.26667
	184	0	0.00714	0
	185	0.075	0.03571	0
	186	0	0.00714	0
	187	0	0.03571	0
	188	0.075	0.00714	0.16667
	189	0	0	0.03333
	190	0.01667	0.18571	0
	191	0	0.00714	0.16667
	192	0.00833	0.02143	0
	193	0.00833	0	0
	195	0	0.00714	0

## Sheet: 166 AGP
Allele Frequencies at 166 with Graphs by Population for Codominant Data
Data Sheet	Sheet3
Data Title
No. Loci	4
No. Samples	145
No. Pops.	3
Allele Frequencies by Population for 166
Allele	ROPE
155	0.03333
157	0.01667
158	0.025
159	0.01667
160	0.03333
162	0.01667
163	0.025
164	0.04167
165	0.05833
166	0.13333
167	0.05833
168	0.46667
169	0.025
170	0.025
171	0.01667
174	0
175	0.00833
Allele	FRAME
155	0
157	0
158	0
159	0
160	0.07857
162	0
163	0.27143
164	0.05714
165	0.00714
166	0.00714
167	0
168	0.52143
169	0.00714
170	0.00714
171	0
174	0.04286
175	0
Allele	DOME
155	0
157	0
158	0
159	0
160	0.03333
162	0.03333
163	0.03333
164	0.03333
165	0.2
166	0.3
167	0
168	0.06667
169	0.3
170	0
171	0
174	0
175	0

## Sheet: 181 AGP
Allele Frequencies at 181 with Graphs by Population for Codominant Data
Data Sheet	Sheet3
Data Title
No. Loci	4
No. Samples	145
No. Pops.	3
Allele Frequencies by Population for 181
Allele	ROPE
145	0.04167
147	0.00833
150	0.03333
151	0.04167
152	0.55
153	0.03333
154	0.125
155	0
156	0.01667
157	0.075
160	0.06667
162	0.00833
Allele	FRAME
145	0
147	0.05
150	0.12143
151	0
152	0.7
153	0.05714
154	0.04286
155	0.00714
156	0.02143
157	0
160	0
162	0
Allele	DOME
145	0
147	0
150	0.23333
151	0.03333
152	0.33333
153	0.16667
154	0.23333
155	0
156	0
157	0
160	0
162	0

## Sheet: 182 AGP
Allele Frequencies at 182 with Graphs by Population for Codominant Data
Data Sheet	Sheet3
Data Title
No. Loci	4
No. Samples	145
No. Pops.	3
Allele Frequencies by Population for 182
Allele	ROPE
150	0
154	0
157	0.09167
159	0
160	0
161	0.14167
162	0
163	0.1
164	0.06667
165	0.2
166	0
167	0.09167
168	0.01667
170	0
171	0.08333
173	0
174	0.10833
175	0.08333
178	0.01667
Allele	FRAME
150	0.00714
154	0.01429
157	0.04286
159	0.03571
160	0.00714
161	0.09286
162	0.00714
163	0.06429
164	0
165	0.13571
166	0.01429
167	0.03571
168	0.1
170	0.01429
171	0
173	0.15714
174	0.27143
175	0
178	0
Allele	DOME
150	0
154	0
157	0
159	0
160	0
161	0
162	0
163	0
164	0
165	0
166	0
167	0.1
168	0.4
170	0
171	0
173	0.5
174	0
175	0
178	0

## Sheet: 207 AGP
Allele Frequencies at 207 with Graphs by Population for Codominant Data
Data Sheet	Sheet3
Data Title
No. Loci	4
No. Samples	145
No. Pops.	3
Allele Frequencies by Population for 207
Allele	ROPE
175	0.01667
176	0.01667
177	0.08333
178	0
179	0
180	0.19167
181	0.15
182	0.05
183	0.30833
184	0
185	0.075
186	0
187	0
188	0.075
189	0
190	0.01667
191	0
192	0.00833
193	0.00833
195	0
Allele	FRAME
175	0.02143
176	0
177	0.05
178	0.09286
179	0.01429
180	0.12143
181	0.03571
182	0.35
183	0
184	0.00714
185	0.03571
186	0.00714
187	0.03571
188	0.00714
189	0
190	0.18571
191	0.00714
192	0.02143
193	0
195	0.00714
Allele	DOME
175	0
176	0
177	0
178	0
179	0
180	0
181	0
182	0.36667
183	0.26667
184	0
185	0
186	0
187	0
188	0.16667
189	0.03333
190	0
191	0.16667
192	0
193	0
195	0

## Sheet: AFL
Allele Frequencies by Locus for Codominant Data
Data Sheet	Sheet3
Data Title
No. Loci	4
No. Samples	145
No. Pops.	3
Allele Frequencies and Sample Size by Locus
Pop	Allele/n	166	181	182	207
ROPE	N	60	60	60	60
	145		0.04167
	147		0.00833
	150		0.03333	0
	151		0.04167
	152		0.55
	153		0.03333
	154		0.125	0
	155	0.03333	0
	156		0.01667
	157	0.01667	0.075	0.09167
	158	0.025
	159	0.01667		0
	160	0.03333	0.06667	0
	161			0.14167
	162	0.01667	0.00833	0
	163	0.025		0.1
	164	0.04167		0.06667
	165	0.05833		0.2
	166	0.13333		0
	167	0.05833		0.09167
	168	0.46667		0.01667
	169	0.025
	170	0.025		0
	171	0.01667		0.08333
	173			0
	174	0		0.10833
	175	0.00833		0.08333	0.01667
	176				0.01667
	177				0.08333
	178			0.01667	0
	179				0
	180				0.19167
	181				0.15
	182				0.05
	183				0.30833
	184				0
	185				0.075
	186				0
	187				0
	188				0.075
	189				0
	190				0.01667
	191				0
	192				0.00833
	193				0.00833
	195				0
FRAME	N	70	70	70	70
	145		0
	147		0.05
	150		0.12143	0.00714
	151		0
	152		0.7
	153		0.05714
	154		0.04286	0.01429
	155	0	0.00714
	156		0.02143
	157	0	0	0.04286
	158	0
	159	0		0.03571
	160	0.07857	0	0.00714
	161			0.09286
	162	0	0	0.00714
	163	0.27143		0.06429
	164	0.05714		0
	165	0.00714		0.13571
	166	0.00714		0.01429
	167	0		0.03571
	168	0.52143		0.1
	169	0.00714
	170	0.00714		0.01429
	171	0		0
	173			0.15714
	174	0.04286		0.27143
	175	0		0	0.02143
	176				0
	177				0.05
	178			0	0.09286
	179				0.01429
	180				0.12143
	181				0.03571
	182				0.35
	183				0
	184				0.00714
	185				0.03571
	186				0.00714
	187				0.03571
	188				0.00714
	189				0
	190				0.18571
	191				0.00714
	192				0.02143
	193				0
	195				0.00714
DOME	N	15	15	15	15
	145		0
	147		0
	150		0.23333	0
	151		0.03333
	152		0.33333
	153		0.16667
	154		0.23333	0
	155	0	0
	156		0
	157	0	0	0
	158	0
	159	0		0
	160	0.03333	0	0
	161			0
	162	0.03333	0	0
	163	0.03333		0
	164	0.03333		0
	165	0.2		0
	166	0.3		0
	167	0		0.1
	168	0.06667		0.4
	169	0.3
	170	0		0
	171	0		0
	173			0.5
	174	0		0
	175	0		0	0
	176				0
	177				0
	178			0	0
	179				0
	180				0
	181				0
	182				0.36667
	183				0.26667
	184				0
	185				0
	186				0
	187				0
	188				0.16667
	189				0.03333
	190				0
	191				0.16667
	192				0
	193				0
	195				0

## Sheet: HFP
Heterozygosity, Fstatistics and Polymorphism by Population for Codominant Data
Data Sheet	Sheet3
Data Title
No. Loci	4
No. Samples	145
No. Pops.	3
Sample Size, No. Alleles, No. Effective Alleles, Information Index, Observed Heterozygosity, Expected and Unbiased Expected Heterozygosity, and Fixation Index
Pop	Locus	N	Na	Ne	I	Ho	He	UHe	F
ROPE	166	60	16	4	1.99674	0.566667	0.75	0.756303	0.244444
	181	60	11	2.99128	1.60316	0.316667	0.665694	0.671289	0.524306
	182	60	11	8.51064	2.23904	0.716667	0.8825	0.889916	0.187913
	207	60	12	5.68272	1.99389	0.466667	0.824028	0.830952	0.433676
FRAME	166	70	9	2.8008	1.33311	0.714286	0.642959	0.647585	-0.110935
	181	70	7	1.94986	1.07168	0.457143	0.487143	0.490647	0.0615836
	182	70	15	6.91114	2.20417	0.614286	0.855306	0.861459	0.281794
	207	70	16	5.31742	2.0655	0.657143	0.811939	0.81778	0.19065
DOME	166	15	8	4.36893	1.6783	0.866667	0.771111	0.797701	-0.123919
	181	15	5	4.01786	1.45734	0.866667	0.751111	0.777011	-0.153846
	182	15	3	2.38095	0.943348	1	0.58	0.6	-0.724138
	207	15	5	3.81356	1.43097	0.6	0.737778	0.763218	0.186747
Mean and SE over Loci for each Pop
Pop		N	Na	Ne	I	Ho	He	UHe	F
ROPE	Mean	60	12.5	5.29616	1.95821	0.516667	0.780556	0.787115	0.347585
	SE	0	1.19024	1.20675	0.131555	0.0841625	0.0469123	0.0473066	0.0789384
FRAME	Mean	70	11.75	4.24481	1.66862	0.610714	0.699337	0.704368	0.105773
	SE	0	2.21265	1.14061	0.275868	0.0551359	0.0842666	0.0848728	0.0851971
DOME	Mean	15	5.25	3.64533	1.37749	0.833333	0.71	0.734483	-0.203789
	SE	0	1.03078	0.436781	0.154974	0.083887	0.0438713	0.0453841	0.189771
Grand Mean and SE over Loci and Pops
		N	Na	Ne	I	Ho	He	UHe	F
Total	Mean	48.3333	9.83333	4.39543	1.6681	0.653571	0.729964	0.741989	0.0831897
	SE	7.2125	1.27822	0.557066	0.125637	0.0562395	0.0337437	0.0339389	0.0955494
F-Statistics and Estimates of Nm over All Pops for each Locus
All Pops.	Locus	Fis	Fit	Fst		Nm
	166	0.00760199	0.123892	0.117181		1.88346
	181	0.138382	0.192276	0.0625495		3.74684
	182	-0.00567185	0.111663	0.116673		1.89273
	207	0.273802	0.334601	0.0837227		2.73605
	Mean	0.103528	0.190608	0.0950315		2.56477
	SE	0.0654053	0.0511697	0.0133602		0.441818
Percentage of Polymorphic Loci
Population	%P
ROPE	1
FRAME	1
DOME	1
Mean	1
SE	0
Na = No. of Different Alleles
Ne = No. of Effective Alleles = 1 / (Sum pi^2)
I = Shannon's Information Index = -1* Sum (pi * Ln (pi))
Ho = Observed Heterozygosity = No. of Hets / N
He = Expected Heterozygosity = 1 - Sum pi^2
UHe = Unbiased Expected Heterozygosity = (2N / (2N-1)) * He
F = Fixation Index = (He - Ho) / He = 1 - (Ho / He)
Where pi is the frequency of the ith allele for the population & Sum pi^2 is the sum of the squared population allele frequencies.
Fis = (Mean He - Mean Ho) / Mean He
Fit = (Ht - Mean Ho) / Ht
Fst = (Ht - Mean He) / Ht
Nm = [(1 / Fst) - 1] / 4
Key: Mean He = Average He across the populations. Mean Ho = Average Ho across the populations.
Ht = Total Expected Heterozygosity = 1 - Sum tpi^2 where tpi is the frequency of the ith allele for the total & Sum tpi^2 is the sum of the squared total allele frequencies.
Tip: Choose the Step by Step option to show Mean He, Mean Ho and Ht values.

[truncated: 18 more sheets: HFL, APT, ALI, PAS, PAL, P1X, P2X, P3X, GP, PI, MS, DS, MDS, MLS, MLD, MAL, ML2, GD]
